# Supplementary material for: Chiral tridentate bis(oxazol-2-ylimino) isoindoline-based pincer ligands: isolation and characterization via deligation from in situ prepared Cd-ligand complexes
Source: Royal Society of Chemistry journal article supplement (doi:10.1039/d0dt02531c), 2021-01-01
Supplement: d0dt02531c1.pdf [file d0dt02531c1.pdf]

## Chiral Tridentate Bis(oxazol-2-ylimino) Isoindoline-based Pincer Ligands: Isolation and Characterization via Deligation from *In-Situ* Prepared Cd- Ligand Complexes.

Kristina Zivkovic,<sup>a</sup> Lilia M. Baldauf,<sup>a</sup> Jessica L. Cryder,<sup>a</sup> Alexa Villaseñor,<sup>a</sup> Valeria Reyes,<sup>a</sup> Lauren E. Bernier,<sup>c</sup> Theresa J. Thomas,<sup>a</sup> Maxwell O'Toole,<sup>a</sup> Kayleen Fulton,<sup>a</sup> Curtis E. Moore,<sup>b</sup> Arnold L. Rheingold,<sup>b</sup> and Christopher J. A. Daley<sup>a\*</sup>

<sup>a</sup> Department of Chemistry and Biochemistry, University of San Diego, 5998 Alcalá Park, San Diego, USA. Tel: 619-260-4033; E-mail: cjdaley@sandiego.edu.

<sup>b</sup> Department of Chemistry and Biochemistry, University of California, San Diego, 9500 Gilman Drive, MC 0332, La Jolla, CA, USA.

### *Electronic Supplementary Material*

| Title                                                   | Page |
|---------------------------------------------------------|------|
| XRD data for Cd(( <i>R,R</i> )- <b>5</b> ) <sub>2</sub> | 2    |
| XRD data for Cd(( <i>S,S</i> )- <b>6</b> ) <sub>2</sub> | 8    |
| XRD data for ( <i>R,R</i> )- <b>5H</b>                  | 14   |
| XRD data for ( <i>S,S</i> )- <b>6H</b>                  | 20   |
| XRD data for Pd(( <i>S,S</i> )- <b>6</b> ) <sub>2</sub> | 31   |

XRD data for Cd((R,R)-5)<sub>2</sub>

Table 1. Crystal data and structure refinement for Cd((R,R)-5)<sub>2</sub>.

|                                   |                                                                   |           |
|-----------------------------------|-------------------------------------------------------------------|-----------|
| Identification code               | daley04_0m_sq                                                     |           |
| Empirical formula                 | C <sub>52</sub> H <sub>40</sub> Cd N <sub>10</sub> O <sub>4</sub> |           |
| Formula weight                    | 981.34                                                            |           |
| Temperature                       | 150.0 K                                                           |           |
| Wavelength                        | 0.71073 Å                                                         |           |
| Crystal system                    | Trigonal                                                          |           |
| Space group                       | P 31 2 1                                                          |           |
| Unit cell dimensions              | a = 19.2930(15) Å                                                 | α = 90°.  |
|                                   | b = 19.293 Å                                                      | β = 90°.  |
|                                   | c = 11.7970(9) Å                                                  | γ = 120°. |
| Volume                            | 3802.8(7) Å <sup>3</sup>                                          |           |
| Z                                 | 3                                                                 |           |
| Density (calculated)              | 1.286 Mg/m <sup>3</sup>                                           |           |
| Absorption coefficient            | 0.484 mm <sup>-1</sup>                                            |           |
| F(000)                            | 1506                                                              |           |
| Crystal size                      | 0.33 x 0.1 x 0.06 mm <sup>3</sup>                                 |           |
| Theta range for data collection   | 1.726 to 25.392°.                                                 |           |
| Index ranges                      | -23 ≤ h ≤ 23, -22 ≤ k ≤ 23, -13 ≤ l ≤ 14                          |           |
| Reflections collected             | 32483                                                             |           |
| Independent reflections           | 4673 [R(int) = 0.0509]                                            |           |
| Completeness to theta = 25.242°   | 99.9 %                                                            |           |
| Absorption correction             | Semi-empirical from equivalents                                   |           |
| Max. and min. transmission        | 1.000 and 0.895                                                   |           |
| Refinement method                 | Full-matrix least-squares on F <sup>2</sup>                       |           |
| Data / restraints / parameters    | 4673 / 1 / 305                                                    |           |
| Goodness-of-fit on F <sup>2</sup> | 0.989                                                             |           |
| Final R indices [I > 2σ(I)]       | R1 = 0.0309, wR2 = 0.0684                                         |           |
| R indices (all data)              | R1 = 0.0390, wR2 = 0.0709                                         |           |
| Absolute structure parameter      | -0.009(11)                                                        |           |
| Extinction coefficient            | n/a                                                               |           |
| Largest diff. peak and hole       | 0.286 and -0.238 e.Å <sup>-3</sup>                                |           |

Table 2. Atomic coordinates ( $\times 10^4$ ) and equivalent isotropic displacement parameters ( $\text{\AA}^2 \times 10^3$ ) for Cd((R,R)-5)<sub>2</sub>. U(eq) is defined as one third of the trace of the orthogonalized U<sup>ij</sup> tensor.

|        | x       | y        | z        | U(eq)  |
|--------|---------|----------|----------|--------|
| C(1)   | 4048(4) | 8817(4)  | 6632(5)  | 68(2)  |
| C(2)   | 3491(5) | 7959(4)  | 6541(5)  | 65(2)  |
| C(3)   | 3896(3) | 8339(3)  | 8332(4)  | 45(1)  |
| C(4)   | 4424(4) | 8589(3)  | 10175(4) | 39(1)  |
| C(5)   | 4337(4) | 8369(3)  | 11383(4) | 37(1)  |
| C(6)   | 3711(4) | 7784(4)  | 11995(5) | 50(2)  |
| C(7)   | 3807(4) | 7746(4)  | 13149(5) | 52(2)  |
| C(8)   | 4517(4) | 8290(4)  | 13671(4) | 57(2)  |
| C(9)   | 5151(4) | 8884(3)  | 13069(4) | 46(1)  |
| C(10)  | 5036(3) | 8911(3)  | 11903(4) | 37(1)  |
| C(11)  | 5540(3) | 9475(3)  | 11005(4) | 39(1)  |
| C(12)  | 6729(3) | 10665(4) | 10514(4) | 47(1)  |
| C(13)  | 7826(4) | 11836(4) | 10155(6) | 71(2)  |
| C(14)  | 7357(4) | 11492(4) | 9075(5)  | 57(2)  |
| C(18)  | 2546(6) | 9955(7)  | 5985(7)  | 79(4)  |
| C(17)  | 2380(6) | 9454(8)  | 6915(7)  | 129(9) |
| C(16)  | 2861(6) | 9124(7)  | 7148(7)  | 102(5) |
| C(15)  | 3508(5) | 9295(6)  | 6451(7)  | 57(2)  |
| C(20)  | 3674(5) | 9796(5)  | 5520(6)  | 57(2)  |
| C(19)  | 3193(6) | 10126(5) | 5287(6)  | 53(4)  |
| C(15B) | 3773(7) | 9374(6)  | 6129(8)  | 57(2)  |
| C(20B) | 4018(6) | 9714(6)  | 5060(7)  | 57(2)  |
| C(19B) | 3704(7) | 10161(6) | 4595(7)  | 65(5)  |
| C(18B) | 3145(9) | 10267(8) | 5198(10) | 79(4)  |
| C(17B) | 2900(8) | 9927(9)  | 6266(9)  | 87(6)  |
| C(16B) | 3214(7) | 9480(8)  | 6731(8)  | 102(5) |
| C(21)  | 7809(4) | 11441(4) | 8078(5)  | 60(2)  |
| C(22)  | 8189(4) | 11008(4) | 8155(7)  | 74(2)  |
| C(23)  | 8635(6) | 10951(6) | 7250(9)  | 101(3) |
| C(24)  | 8690(6) | 11364(6) | 6285(8)  | 94(3)  |
| C(25)  | 8318(5) | 11818(7) | 6166(7)  | 92(3)  |
| C(26)  | 7862(4) | 11835(5) | 7072(5)  | 75(2)  |
| Cd(1)  | 5565(1) | 10000    | 8333     | 45(1)  |
| N(1)   | 4302(3) | 8998(3)  | 7815(3)  | 51(1)  |
| N(2)   | 3859(3) | 8136(3)  | 9469(4)  | 44(1)  |
| N(3)   | 5148(3) | 9260(2)  | 9987(3)  | 38(1)  |
| N(4)   | 6245(3) | 10088(3) | 11267(3) | 44(1)  |
| N(5)   | 6698(3) | 10706(3) | 9430(4)  | 50(1)  |
| O(1)   | 3371(2) | 7681(3)  | 7717(3)  | 53(1)  |
| O(2)   | 7359(3) | 11283(3) | 11039(3) | 66(1)  |

Table 3. Bond lengths [Å] and angles [°] for Cd((R,R)-5)<sub>2</sub>.

|               |            |                  |           |
|---------------|------------|------------------|-----------|
| C(1)-C(2)     | 1.458(9)   | C(17B)-C(16B)    | 1.3900    |
| C(1)-C(15)    | 1.717(9)   | C(21)-C(22)      | 1.363(10) |
| C(1)-C(15B)   | 1.5364(14) | C(21)-C(26)      | 1.386(10) |
| C(1)-N(1)     | 1.463(7)   | C(22)-C(23)      | 1.409(12) |
| C(2)-O(1)     | 1.464(7)   | C(23)-C(24)      | 1.363(13) |
| C(3)-N(1)     | 1.268(7)   | C(24)-C(25)      | 1.389(13) |
| C(3)-N(2)     | 1.389(7)   | C(25)-C(26)      | 1.395(10) |
| C(3)-O(1)     | 1.370(7)   | Cd(1)-N(1)#1     | 2.311(5)  |
| C(4)-C(5)     | 1.472(7)   | Cd(1)-N(1)       | 2.311(5)  |
| C(4)-N(2)     | 1.301(7)   | Cd(1)-N(3)#1     | 2.312(4)  |
| C(4)-N(3)     | 1.367(7)   | Cd(1)-N(3)       | 2.312(4)  |
| C(5)-C(6)     | 1.375(8)   | Cd(1)-N(5)       | 2.308(5)  |
| C(5)-C(10)    | 1.371(8)   | Cd(1)-N(5)#1     | 2.308(5)  |
| C(6)-C(7)     | 1.382(7)   |                  |           |
| C(7)-C(8)     | 1.385(9)   | C(2)-C(1)-C(15)  | 107.4(6)  |
| C(8)-C(9)     | 1.384(8)   | C(2)-C(1)-C(15B) | 116.6(7)  |
| C(9)-C(10)    | 1.398(6)   | C(2)-C(1)-N(1)   | 108.1(5)  |
| C(10)-C(11)   | 1.481(7)   | N(1)-C(1)-C(15)  | 102.2(6)  |
| C(11)-N(3)    | 1.369(6)   | N(1)-C(1)-C(15B) | 113.1(6)  |
| C(11)-N(4)    | 1.317(7)   | C(1)-C(2)-O(1)   | 103.8(5)  |
| C(12)-N(4)    | 1.364(8)   | N(1)-C(3)-N(2)   | 131.8(5)  |
| C(12)-N(5)    | 1.285(6)   | N(1)-C(3)-O(1)   | 118.3(4)  |
| C(12)-O(2)    | 1.354(7)   | O(1)-C(3)-N(2)   | 109.9(5)  |
| C(13)-C(14)   | 1.510(9)   | N(2)-C(4)-C(5)   | 119.3(5)  |
| C(13)-O(2)    | 1.441(8)   | N(2)-C(4)-N(3)   | 130.4(5)  |
| C(14)-C(21)   | 1.497(8)   | N(3)-C(4)-C(5)   | 110.2(5)  |
| C(14)-N(5)    | 1.470(8)   | C(6)-C(5)-C(4)   | 132.2(5)  |
| C(18)-C(17)   | 1.3900     | C(10)-C(5)-C(4)  | 106.7(5)  |
| C(18)-C(19)   | 1.3900     | C(10)-C(5)-C(6)  | 121.1(5)  |
| C(17)-C(16)   | 1.3900     | C(5)-C(6)-C(7)   | 118.3(6)  |
| C(16)-C(15)   | 1.3900     | C(6)-C(7)-C(8)   | 120.4(5)  |
| C(15)-C(20)   | 1.3900     | C(9)-C(8)-C(7)   | 122.0(5)  |
| C(20)-C(19)   | 1.3900     | C(8)-C(9)-C(10)  | 116.4(5)  |
| C(15B)-C(20B) | 1.3900     | C(5)-C(10)-C(9)  | 121.7(5)  |
| C(15B)-C(16B) | 1.3900     | C(5)-C(10)-C(11) | 105.9(4)  |
| C(20B)-C(19B) | 1.3900     | C(9)-C(10)-C(11) | 132.3(5)  |
| C(19B)-C(18B) | 1.3900     | N(3)-C(11)-C(10) | 110.2(5)  |
| C(18B)-C(17B) | 1.3900     | N(4)-C(11)-C(10) | 119.7(4)  |

|                      |            |                     |            |
|----------------------|------------|---------------------|------------|
| N(4)-C(11)-N(3)      | 130.1(5)   | N(5)-Cd(1)-N(1)     | 158.98(15) |
| N(5)-C(12)-N(4)      | 131.6(6)   | N(5)#1-Cd(1)-N(1)   | 84.04(19)  |
| N(5)-C(12)-O(2)      | 116.7(6)   | N(5)-Cd(1)-N(3)#1   | 103.03(16) |
| O(2)-C(12)-N(4)      | 111.6(4)   | N(5)#1-Cd(1)-N(3)   | 103.03(16) |
| O(2)-C(13)-C(14)     | 105.7(5)   | N(5)-Cd(1)-N(3)     | 80.00(16)  |
| C(21)-C(14)-C(13)    | 116.8(6)   | N(5)#1-Cd(1)-N(3)#1 | 80.00(16)  |
| N(5)-C(14)-C(13)     | 103.4(5)   | N(5)#1-Cd(1)-N(5)   | 98.7(3)    |
| N(5)-C(14)-C(21)     | 112.8(5)   | C(1)-N(1)-Cd(1)     | 122.7(4)   |
| C(17)-C(18)-C(19)    | 120.0      | C(3)-N(1)-C(1)      | 104.7(5)   |
| C(16)-C(17)-C(18)    | 120.0      | C(3)-N(1)-Cd(1)     | 125.2(4)   |
| C(15)-C(16)-C(17)    | 120.0      | C(4)-N(2)-C(3)      | 121.4(5)   |
| C(16)-C(15)-C(1)     | 120.9(5)   | C(4)-N(3)-C(11)     | 107.0(4)   |
| C(16)-C(15)-C(20)    | 120.0      | C(4)-N(3)-Cd(1)     | 126.7(3)   |
| C(20)-C(15)-C(1)     | 118.8(5)   | C(11)-N(3)-Cd(1)    | 125.8(3)   |
| C(15)-C(20)-C(19)    | 120.0      | C(11)-N(4)-C(12)    | 124.0(4)   |
| C(20)-C(19)-C(18)    | 120.0      | C(12)-N(5)-C(14)    | 107.7(5)   |
| C(20B)-C(15B)-C(1)   | 121.7(6)   | C(12)-N(5)-Cd(1)    | 125.5(4)   |
| C(20B)-C(15B)-C(16B) | 120.0      | C(14)-N(5)-Cd(1)    | 121.6(4)   |
| C(16B)-C(15B)-C(1)   | 118.1(6)   | C(3)-O(1)-C(2)      | 104.7(5)   |
| C(15B)-C(20B)-C(19B) | 120.0      | C(12)-O(2)-C(13)    | 105.9(5)   |
| C(18B)-C(19B)-C(20B) | 120.0      |                     |            |
| C(19B)-C(18B)-C(17B) | 120.0      |                     |            |
| C(18B)-C(17B)-C(16B) | 120.0      |                     |            |
| C(17B)-C(16B)-C(15B) | 120.0      |                     |            |
| C(22)-C(21)-C(14)    | 119.9(7)   |                     |            |
| C(22)-C(21)-C(26)    | 118.6(7)   |                     |            |
| C(26)-C(21)-C(14)    | 121.5(7)   |                     |            |
| C(21)-C(22)-C(23)    | 122.3(9)   |                     |            |
| C(24)-C(23)-C(22)    | 117.4(10)  |                     |            |
| C(23)-C(24)-C(25)    | 122.6(8)   |                     |            |
| C(24)-C(25)-C(26)    | 117.9(8)   |                     |            |
| C(21)-C(26)-C(25)    | 121.2(8)   |                     |            |
| N(1)-Cd(1)-N(1)#1    | 100.9(3)   |                     |            |
| N(1)-Cd(1)-N(3)      | 79.08(15)  |                     |            |
| N(1)-Cd(1)-N(3)#1    | 97.98(15)  |                     |            |
| N(1)#1-Cd(1)-N(3)    | 97.98(15)  |                     |            |
| N(1)#1-Cd(1)-N(3)#1  | 79.08(15)  |                     |            |
| N(3)#1-Cd(1)-N(3)    | 175.4(2)   |                     |            |
| N(5)-Cd(1)-N(1)#1    | 84.04(19)  |                     |            |
| N(5)#1-Cd(1)-N(1)#1  | 158.98(15) |                     |            |

---

Symmetry transformations used to generate  
equivalent atoms:

#1 x-y+1,-y+2,-z+5/3

Table 4. Anisotropic displacement parameters ( $\text{\AA}^2 \times 10^3$ ) for Cd((R,R)-5)<sub>2</sub>. The anisotropic displacement factor exponent takes the form:  $-2\pi^2 [ h^2 a^{*2} U^{11} + \dots + 2 h k a^* b^* U^{12} ]$

|        | U <sup>11</sup> | U <sup>22</sup> | U <sup>33</sup> | U <sup>23</sup> | U <sup>13</sup> | U <sup>12</sup> |
|--------|-----------------|-----------------|-----------------|-----------------|-----------------|-----------------|
| C(1)   | 70(4)           | 88(5)           | 29(3)           | 10(3)           | -11(3)          | 28(4)           |
| C(2)   | 98(5)           | 73(5)           | 19(3)           | 3(3)            | -3(3)           | 39(4)           |
| C(3)   | 48(3)           | 60(4)           | 23(2)           | -3(3)           | -8(3)           | 25(3)           |
| C(4)   | 49(3)           | 53(3)           | 22(2)           | -2(2)           | -7(3)           | 30(3)           |
| C(5)   | 47(3)           | 41(3)           | 28(3)           | -1(2)           | -1(2)           | 27(3)           |
| C(6)   | 50(3)           | 66(4)           | 31(3)           | 6(3)            | 1(3)            | 26(3)           |
| C(7)   | 61(4)           | 55(4)           | 31(3)           | 8(3)            | 0(3)            | 22(3)           |
| C(8)   | 90(5)           | 56(4)           | 16(2)           | 7(2)            | -3(3)           | 30(4)           |
| C(9)   | 63(4)           | 46(3)           | 22(3)           | 3(2)            | -4(2)           | 22(3)           |
| C(10)  | 50(3)           | 47(3)           | 19(2)           | 0(2)            | 2(2)            | 29(3)           |
| C(11)  | 50(3)           | 51(3)           | 22(2)           | -6(2)           | -1(2)           | 32(3)           |
| C(12)  | 49(3)           | 59(4)           | 34(3)           | -10(3)          | 2(2)            | 28(3)           |
| C(13)  | 68(4)           | 71(4)           | 44(4)           | -13(3)          | 11(3)           | 12(3)           |
| C(14)  | 61(4)           | 57(4)           | 35(3)           | 2(3)            | 13(3)           | 17(3)           |
| C(18)  | 132(12)         | 102(9)          | 49(6)           | -15(7)          | -34(7)          | 95(10)          |
| C(17)  | 151(18)         | 240(20)         | 65(11)          | 81(14)          | 55(12)          | 147(19)         |
| C(16)  | 127(14)         | 156(15)         | 58(9)           | 55(8)           | 18(7)           | 97(12)          |
| C(15)  | 61(5)           | 57(3)           | 24(4)           | 9(3)            | -5(3)           | 6(4)            |
| C(20)  | 61(5)           | 57(3)           | 24(4)           | 9(3)            | -5(3)           | 6(4)            |
| C(19)  | 79(10)          | 39(7)           | 58(9)           | -3(6)           | -23(8)          | 42(7)           |
| C(15B) | 61(5)           | 57(3)           | 24(4)           | 9(3)            | -5(3)           | 6(4)            |
| C(20B) | 61(5)           | 57(3)           | 24(4)           | 9(3)            | -5(3)           | 6(4)            |
| C(19B) | 103(12)         | 33(8)           | 53(8)           | -3(6)           | -37(9)          | 28(8)           |
| C(18B) | 132(12)         | 102(9)          | 49(6)           | -15(7)          | -34(7)          | 95(10)          |
| C(17B) | 118(17)         | 124(16)         | 66(12)          | -21(13)         | -37(12)         | 96(15)          |
| C(16B) | 127(14)         | 156(15)         | 58(9)           | 55(8)           | 18(7)           | 97(12)          |
| C(21)  | 44(4)           | 69(4)           | 43(3)           | -12(3)          | 7(3)            | 11(3)           |
| C(22)  | 59(4)           | 68(4)           | 69(5)           | 4(4)            | 18(4)           | 12(4)           |
| C(23)  | 91(7)           | 100(7)          | 101(7)          | -20(6)          | 21(6)           | 39(6)           |
| C(24)  | 81(6)           | 103(7)          | 66(5)           | -25(5)          | 29(4)           | 21(5)           |
| C(25)  | 67(6)           | 136(8)          | 41(4)           | 0(4)            | 9(4)            | 26(6)           |
| C(26)  | 48(4)           | 112(6)          | 38(4)           | 4(4)            | 6(3)            | 19(4)           |
| Cd(1)  | 58(1)           | 56(1)           | 19(1)           | 3(1)            | 2(1)            | 28(1)           |
| N(1)   | 62(3)           | 63(3)           | 23(2)           | 10(2)           | -4(2)           | 27(3)           |
| N(2)   | 50(3)           | 58(3)           | 23(2)           | 5(2)            | 4(2)            | 26(3)           |
| N(3)   | 47(3)           | 51(2)           | 18(2)           | -3(2)           | 0(2)            | 27(2)           |
| N(4)   | 50(3)           | 58(3)           | 21(2)           | -1(2)           | 1(2)            | 25(3)           |
| N(5)   | 50(3)           | 64(4)           | 22(2)           | -1(2)           | 6(2)            | 18(3)           |
| O(1)   | 65(3)           | 64(3)           | 21(2)           | 1(2)            | -8(2)           | 25(2)           |
| O(2)   | 67(3)           | 66(3)           | 32(2)           | -9(2)           | 5(2)            | 9(2)            |

Table 5. Hydrogen coordinates ( $\times 10^4$ ) and isotropic displacement parameters ( $\text{\AA}^2 \times 10^{-3}$ ) for Cd((R,R)-5)2.

|        | x    | y     | z     | U(eq) |
|--------|------|-------|-------|-------|
| H(1A)  | 4509 | 9009  | 6094  | 81    |
| H(1B)  | 4535 | 8922  | 6194  | 81    |
| H(2A)  | 3722 | 7695  | 6082  | 78    |
| H(2B)  | 2980 | 7853  | 6194  | 78    |
| H(6)   | 3224 | 7416  | 11633 | 60    |
| H(7)   | 3384 | 7344  | 13588 | 62    |
| H(8)   | 4570 | 8254  | 14466 | 68    |
| H(9)   | 5639 | 9254  | 13428 | 55    |
| H(13A) | 8360 | 11884 | 10099 | 85    |
| H(13B) | 7897 | 12373 | 10307 | 85    |
| H(14)  | 7120 | 11830 | 8851  | 68    |
| H(18)  | 2217 | 10181 | 5826  | 94    |
| H(17)  | 1938 | 9338  | 7392  | 154   |
| H(16)  | 2747 | 8782  | 7784  | 123   |
| H(20)  | 4116 | 9913  | 5043  | 69    |
| H(19)  | 3306 | 10468 | 4651  | 64    |
| H(20B) | 4400 | 9641  | 4648  | 69    |
| H(19B) | 3872 | 10393 | 3865  | 78    |
| H(18B) | 2931 | 10572 | 4880  | 94    |
| H(17B) | 2518 | 10000 | 6678  | 105   |
| H(16B) | 3046 | 9248  | 7461  | 123   |
| H(22)  | 8153 | 10735 | 8842  | 89    |
| H(23)  | 8888 | 10638 | 7310  | 122   |
| H(24)  | 8994 | 11340 | 5669  | 113   |
| H(25)  | 8373 | 12108 | 5489  | 111   |
| H(26)  | 7584 | 12123 | 6998  | 91    |

XRD data for Cd((S,S)-6)<sub>2</sub>

Table 1. Crystal data and structure refinement for Cd((S,S)-6)<sub>2</sub>.

|                                   |                                             |           |
|-----------------------------------|---------------------------------------------|-----------|
| Identification code               | daley05_sq                                  |           |
| Empirical formula                 | C40 H48 Cd N10 O4                           |           |
| Formula weight                    | 845.28                                      |           |
| Temperature                       | 120.0 K                                     |           |
| Wavelength                        | 0.71073 Å                                   |           |
| Crystal system                    | Trigonal                                    |           |
| Space group                       | P 32 2 1                                    |           |
| Unit cell dimensions              | a = 19.1032(14) Å                           | α = 90°.  |
|                                   | b = 19.1032 Å                               | β = 90°.  |
|                                   | c = 11.8529(9) Å                            | γ = 120°. |
| Volume                            | 3746.0(6) Å <sup>3</sup>                    |           |
| Z                                 | 3                                           |           |
| Density (calculated)              | 1.124 Mg/m <sup>3</sup>                     |           |
| Absorption coefficient            | 0.480 mm <sup>-1</sup>                      |           |
| F(000)                            | 1314                                        |           |
| Crystal size                      | 0.453 x 0.157 x 0.155 mm <sup>3</sup>       |           |
| Theta range for data collection   | 1.231 to 27.490°.                           |           |
| Index ranges                      | -24 ≤ h ≤ 24, -20 ≤ k ≤ 24, -15 ≤ l ≤ 14    |           |
| Reflections collected             | 25490                                       |           |
| Independent reflections           | 5594 [R(int) = 0.0285]                      |           |
| Completeness to theta = 25.242°   | 99.8 %                                      |           |
| Absorption correction             | Semi-empirical from equivalents             |           |
| Max. and min. transmission        | 0.477 and 0.400                             |           |
| Refinement method                 | Full-matrix least-squares on F <sup>2</sup> |           |
| Data / restraints / parameters    | 5594 / 0 / 253                              |           |
| Goodness-of-fit on F <sup>2</sup> | 1.060                                       |           |
| Final R indices [I > 2σ(I)]       | R1 = 0.0249, wR2 = 0.0629                   |           |
| R indices (all data)              | R1 = 0.0271, wR2 = 0.0642                   |           |
| Absolute structure parameter      | -0.002(7)                                   |           |
| Extinction coefficient            | n/a                                         |           |
| Largest diff. peak and hole       | 0.639 and -0.336 e.Å <sup>-3</sup>          |           |



Table 2. Atomic coordinates ( $\times 10^4$ ) and equivalent isotropic displacement parameters ( $\text{\AA}^2 \times 10^3$ ) for Cd((S,S)-**6**)<sub>2</sub>. U(eq) is defined as one third of the trace of the orthogonalized U<sup>ij</sup> tensor.

|       | x       | y        | z        | U(eq)  |
|-------|---------|----------|----------|--------|
| C(1)  | 5927(2) | 1120(2)  | 3412(2)  | 34(1)  |
| C(2)  | 6455(2) | 2032(2)  | 3496(2)  | 38(1)  |
| C(3)  | 6071(2) | 1672(2)  | 1711(2)  | 27(1)  |
| C(4)  | 5555(2) | 1431(2)  | -132(2)  | 26(1)  |
| C(5)  | 5667(2) | 1653(2)  | -1340(2) | 27(1)  |
| C(6)  | 6320(2) | 2258(2)  | -1925(2) | 30(1)  |
| C(7)  | 6237(2) | 2286(2)  | -3092(2) | 33(1)  |
| C(8)  | 5528(2) | 1738(2)  | -3631(2) | 35(1)  |
| C(9)  | 4869(2) | 1130(2)  | -3047(2) | 33(1)  |
| C(10) | 4963(2) | 1104(1)  | -1885(2) | 27(1)  |
| C(11) | 4429(2) | 534(2)   | -1009(2) | 29(1)  |
| C(12) | 3235(2) | -655(2)  | -551(2)  | 34(1)  |
| C(13) | 2187(2) | -1910(2) | -248(3)  | 52(1)  |
| C(14) | 2548(2) | -1493(2) | 879(3)   | 40(1)  |
| C(15) | 6323(3) | 623(3)   | 3692(3)  | 56(1)  |
| C(16) | 7040(3) | 831(4)   | 2966(4)  | 81(2)  |
| C(17) | 6519(4) | 692(3)   | 4965(3)  | 72(1)  |
| C(18) | 1963(3) | -1402(3) | 1655(4)  | 65(1)  |
| C(19) | 1339(4) | -2227(3) | 2110(5)  | 107(2) |
| C(20) | 1552(4) | -992(4)  | 1065(7)  | 121(3) |
| N(1)  | 5652(2) | 1003(1)  | 2225(2)  | 32(1)  |
| N(2)  | 6120(1) | 1875(1)  | 585(2)   | 28(1)  |
| N(3)  | 4809(2) | 759(1)   | 28(2)    | 28(1)  |
| N(4)  | 3728(2) | -80(1)   | -1294(2) | 33(1)  |
| N(5)  | 3234(2) | -697(1)  | 533(2)   | 33(1)  |
| O(1)  | 6609(1) | 2310(1)  | 2333(2)  | 35(1)  |
| O(2)  | 2642(2) | -1315(1) | -1099(2) | 48(1)  |
| Cd(1) | 4365(1) | 0        | 1667     | 28(1)  |

Table 3. Bond lengths [ $\text{\AA}$ ] and angles [ $^\circ$ ] for  $\text{Cd}((\text{S,S})\text{-6})_2$ .

|                 |          |                   |            |
|-----------------|----------|-------------------|------------|
| C(1)-C(2)       | 1.518(4) | N(1)-C(3)-N(2)    | 131.7(3)   |
| C(1)-C(15)      | 1.517(5) | N(1)-C(3)-O(1)    | 117.2(2)   |
| C(1)-N(1)       | 1.480(3) | O(1)-C(3)-N(2)    | 111.1(2)   |
| C(2)-O(1)       | 1.453(3) | N(2)-C(4)-C(5)    | 119.5(2)   |
| C(3)-N(1)       | 1.273(4) | N(2)-C(4)-N(3)    | 130.9(2)   |
| C(3)-N(2)       | 1.380(3) | N(3)-C(4)-C(5)    | 109.6(2)   |
| C(3)-O(1)       | 1.354(3) | C(6)-C(5)-C(4)    | 131.6(3)   |
| C(4)-C(5)       | 1.478(3) | C(10)-C(5)-C(4)   | 106.7(2)   |
| C(4)-N(2)       | 1.301(3) | C(10)-C(5)-C(6)   | 121.7(2)   |
| C(4)-N(3)       | 1.373(3) | C(5)-C(6)-C(7)    | 117.0(3)   |
| C(5)-C(6)       | 1.389(4) | C(8)-C(7)-C(6)    | 121.0(3)   |
| C(5)-C(10)      | 1.384(4) | C(7)-C(8)-C(9)    | 122.2(3)   |
| C(6)-C(7)       | 1.398(4) | C(10)-C(9)-C(8)   | 116.2(3)   |
| C(7)-C(8)       | 1.386(4) | C(5)-C(10)-C(9)   | 121.9(2)   |
| C(8)-C(9)       | 1.395(4) | C(5)-C(10)-C(11)  | 106.3(2)   |
| C(9)-C(10)      | 1.393(3) | C(9)-C(10)-C(11)  | 131.8(3)   |
| C(10)-C(11)     | 1.482(4) | N(3)-C(11)-C(10)  | 109.4(2)   |
| C(11)-N(3)      | 1.382(3) | N(4)-C(11)-C(10)  | 119.8(2)   |
| C(11)-N(4)      | 1.309(3) | N(4)-C(11)-N(3)   | 130.7(2)   |
| C(12)-N(4)      | 1.355(4) | N(4)-C(12)-O(2)   | 111.0(2)   |
| C(12)-N(5)      | 1.287(3) | N(5)-C(12)-N(4)   | 132.8(3)   |
| C(12)-O(2)      | 1.368(3) | N(5)-C(12)-O(2)   | 116.2(3)   |
| C(13)-C(14)     | 1.530(5) | O(2)-C(13)-C(14)  | 105.3(2)   |
| C(13)-O(2)      | 1.441(4) | C(18)-C(14)-C(13) | 114.9(3)   |
| C(14)-C(18)     | 1.524(5) | N(5)-C(14)-C(13)  | 103.3(2)   |
| C(14)-N(5)      | 1.484(4) | N(5)-C(14)-C(18)  | 111.9(3)   |
| C(15)-C(16)     | 1.494(6) | C(1)-C(15)-C(17)  | 109.6(3)   |
| C(15)-C(17)     | 1.543(5) | C(16)-C(15)-C(1)  | 112.6(3)   |
| C(18)-C(19)     | 1.522(6) | C(16)-C(15)-C(17) | 112.9(4)   |
| C(18)-C(20)     | 1.528(8) | C(14)-C(18)-C(20) | 112.1(4)   |
| N(1)-Cd(1)      | 2.333(3) | C(19)-C(18)-C(14) | 109.6(4)   |
| N(3)-Cd(1)      | 2.316(2) | C(19)-C(18)-C(20) | 110.9(5)   |
| N(5)-Cd(1)      | 2.317(2) | C(1)-N(1)-Cd(1)   | 122.85(18) |
|                 |          | C(3)-N(1)-C(1)    | 107.8(2)   |
| C(15)-C(1)-C(2) | 116.8(3) | C(3)-N(1)-Cd(1)   | 124.40(19) |
| N(1)-C(1)-C(2)  | 102.6(2) | C(4)-N(2)-C(3)    | 122.1(2)   |
| N(1)-C(1)-C(15) | 111.4(2) | C(4)-N(3)-C(11)   | 107.8(2)   |
| O(1)-C(2)-C(1)  | 104.7(2) | C(4)-N(3)-Cd(1)   | 125.81(17) |

|                     |            |
|---------------------|------------|
| C(11)-N(3)-Cd(1)    | 125.44(17) |
| C(11)-N(4)-C(12)    | 122.9(2)   |
| C(12)-N(5)-C(14)    | 108.2(2)   |
| C(12)-N(5)-Cd(1)    | 124.8(2)   |
| C(14)-N(5)-Cd(1)    | 121.35(19) |
| C(3)-O(1)-C(2)      | 105.3(2)   |
| C(12)-O(2)-C(13)    | 106.8(2)   |
| N(1)-Cd(1)-N(1)#1   | 99.97(13)  |
| N(3)#1-Cd(1)-N(1)#1 | 79.50(8)   |
| N(3)#1-Cd(1)-N(1)   | 96.53(8)   |
| N(3)-Cd(1)-N(1)     | 79.50(8)   |
| N(3)-Cd(1)-N(1)#1   | 96.53(8)   |
| N(3)#1-Cd(1)-N(3)   | 173.90(13) |
| N(3)#1-Cd(1)-N(5)   | 104.53(8)  |
| N(3)-Cd(1)-N(5)#1   | 104.53(8)  |
| N(3)-Cd(1)-N(5)     | 79.50(8)   |
| N(3)#1-Cd(1)-N(5)#1 | 79.50(8)   |
| N(5)-Cd(1)-N(1)#1   | 84.03(9)   |
| N(5)#1-Cd(1)-N(1)#1 | 158.94(8)  |
| N(5)-Cd(1)-N(1)     | 158.94(8)  |
| N(5)#1-Cd(1)-N(1)   | 84.03(9)   |
| N(5)#1-Cd(1)-N(5)   | 99.70(13)  |

---

Symmetry transformations used to generate

equivalent atoms:

#1 x-y,-y,-z+1/3

Table 4. Anisotropic displacement parameters ( $\text{\AA}^2 \times 10^3$ ) for Cd((S,S)-**6**)<sub>2</sub>. The anisotropic displacement factor exponent takes the form:  $-2\pi^2 [ h^2 a^{*2} U^{11} + \dots + 2 h k a^* b^* U^{12} ]$

|       | U <sup>11</sup> | U <sup>22</sup> | U <sup>33</sup> | U <sup>23</sup> | U <sup>13</sup> | U <sup>12</sup> |
|-------|-----------------|-----------------|-----------------|-----------------|-----------------|-----------------|
| C(1)  | 45(2)           | 33(2)           | 17(1)           | -1(1)           | -3(1)           | 15(1)           |
| C(2)  | 53(2)           | 33(2)           | 17(1)           | 3(1)            | -5(1)           | 12(1)           |
| C(3)  | 32(1)           | 26(1)           | 18(1)           | -2(1)           | -2(1)           | 11(1)           |
| C(4)  | 36(2)           | 24(1)           | 15(1)           | 2(1)            | 1(1)            | 14(1)           |
| C(5)  | 38(2)           | 27(1)           | 16(1)           | 2(1)            | 1(1)            | 17(1)           |
| C(6)  | 37(2)           | 30(1)           | 22(1)           | 5(1)            | 5(1)            | 17(1)           |
| C(7)  | 48(2)           | 33(1)           | 20(1)           | 9(1)            | 9(1)            | 22(1)           |
| C(8)  | 57(2)           | 34(2)           | 14(1)           | 5(1)            | 6(1)            | 23(1)           |
| C(9)  | 50(2)           | 25(1)           | 19(1)           | -1(1)           | -1(1)           | 15(1)           |
| C(10) | 40(2)           | 21(1)           | 18(1)           | 3(1)            | 5(1)            | 14(1)           |
| C(11) | 44(2)           | 22(1)           | 15(1)           | 1(1)            | 1(1)            | 12(1)           |
| C(12) | 41(2)           | 26(1)           | 24(1)           | -4(1)           | -5(1)           | 8(1)            |
| C(13) | 55(2)           | 32(2)           | 40(2)           | -1(1)           | 3(2)            | -1(2)           |
| C(14) | 40(2)           | 30(2)           | 31(2)           | 7(1)            | 7(1)            | 5(1)            |
| C(15) | 94(3)           | 61(2)           | 27(2)           | 0(2)            | -12(2)          | 50(2)           |
| C(16) | 91(4)           | 118(4)          | 64(3)           | 6(3)            | -1(3)           | 74(4)           |
| C(17) | 128(4)          | 79(3)           | 36(2)           | -8(2)           | -28(2)          | 72(3)           |
| C(18) | 58(2)           | 57(2)           | 66(3)           | 0(2)            | 22(2)           | 17(2)           |
| C(19) | 94(4)           | 76(4)           | 129(5)          | 38(3)           | 71(4)           | 27(3)           |
| C(20) | 89(4)           | 94(4)           | 175(8)          | 14(5)           | 48(5)           | 42(4)           |
| N(1)  | 47(1)           | 29(1)           | 15(1)           | 1(1)            | -3(1)           | 14(1)           |
| N(2)  | 33(1)           | 27(1)           | 18(1)           | 3(1)            | 1(1)            | 11(1)           |
| N(3)  | 36(1)           | 25(1)           | 14(1)           | 0(1)            | 0(1)            | 9(1)            |
| N(4)  | 44(2)           | 24(1)           | 19(1)           | 0(1)            | -4(1)           | 9(1)            |
| N(5)  | 40(1)           | 27(1)           | 22(1)           | 3(1)            | 3(1)            | 8(1)            |
| O(1)  | 42(1)           | 30(1)           | 18(1)           | 3(1)            | -4(1)           | 6(1)            |
| O(2)  | 52(1)           | 30(1)           | 30(1)           | -3(1)           | -3(1)           | -2(1)           |
| Cd(1) | 42(1)           | 20(1)           | 13(1)           | 1(1)            | 1(1)            | 10(1)           |

Table 5. Hydrogen coordinates ( $\times 10^4$ ) and isotropic displacement parameters ( $\text{\AA}^2 \times 10^{-3}$ ) for Cd((S,S)-**6**)<sub>2</sub>.

|        | x    | y     | z     | U(eq) |
|--------|------|-------|-------|-------|
| H(1)   | 5447 | 943   | 3914  | 40    |
| H(2A)  | 6170 | 2268  | 3906  | 46    |
| H(2B)  | 6966 | 2181  | 3893  | 46    |
| H(6)   | 6801 | 2636  | -1547 | 36    |
| H(7)   | 6672 | 2688  | -3523 | 39    |
| H(8)   | 5488 | 1777  | -4425 | 42    |
| H(9)   | 4385 | 756   | -3421 | 40    |
| H(13A) | 2244 | -2394 | -342  | 62    |
| H(13B) | 1607 | -2076 | -291  | 62    |
| H(14)  | 2766 | -1803 | 1284  | 47    |
| H(15)  | 5914 | 45    | 3539  | 67    |
| H(16A) | 6894 | 823   | 2171  | 122   |
| H(16B) | 7216 | 435   | 3087  | 122   |
| H(16C) | 7481 | 1372  | 3163  | 122   |
| H(17A) | 6695 | 307   | 5166  | 109   |
| H(17B) | 6035 | 572   | 5399  | 109   |
| H(17C) | 6951 | 1242  | 5136  | 109   |
| H(18)  | 2277 | -1056 | 2309  | 79    |
| H(19A) | 1088 | -2604 | 1481  | 160   |
| H(19B) | 923  | -2178 | 2529  | 160   |
| H(19C) | 1605 | -2429 | 2614  | 160   |
| H(20A) | 1149 | -1371 | 530   | 182   |
| H(20B) | 1958 | -514  | 657   | 182   |
| H(20C) | 1285 | -828  | 1627  | 182   |

## XRD data for (R,R)-5H

Table 1. Crystal data and structure refinement for (R,R)-5H.

|                                   |                                                               |          |
|-----------------------------------|---------------------------------------------------------------|----------|
| Identification code               | daley10                                                       |          |
| Empirical formula                 | C <sub>26</sub> H <sub>21</sub> N <sub>5</sub> O <sub>2</sub> |          |
| Formula weight                    | 435.48                                                        |          |
| Temperature                       | 120.0 K                                                       |          |
| Wavelength                        | 1.54178 Å                                                     |          |
| Crystal system                    | Orthorhombic                                                  |          |
| Space group                       | P 21 21 21                                                    |          |
| Unit cell dimensions              | a = 6.1731(2) Å                                               | α = 90°. |
|                                   | b = 9.1085(3) Å                                               | β = 90°. |
|                                   | c = 37.2539(12) Å                                             | γ = 90°. |
| Volume                            | 2094.70(12) Å <sup>3</sup>                                    |          |
| Z                                 | 4                                                             |          |
| Density (calculated)              | 1.381 Mg/m <sup>3</sup>                                       |          |
| Absorption coefficient            | 0.730 mm <sup>-1</sup>                                        |          |
| F(000)                            | 912                                                           |          |
| Crystal size                      | 0.35 x 0.25 x 0.12 mm <sup>3</sup>                            |          |
| Theta range for data collection   | 4.748 to 64.541°.                                             |          |
| Index ranges                      | -7 ≤ h ≤ 7, -10 ≤ k ≤ 9, -42 ≤ l ≤ 42                         |          |
| Reflections collected             | 6476                                                          |          |
| Independent reflections           | 3056 [R(int) = 0.0298]                                        |          |
| Completeness to theta = 64.541°   | 97.4 %                                                        |          |
| Absorption correction             | Semi-empirical from equivalents                               |          |
| Max. and min. transmission        | 0.9175 and 0.7841                                             |          |
| Refinement method                 | Full-matrix least-squares on F <sup>2</sup>                   |          |
| Data / restraints / parameters    | 3056 / 0 / 299                                                |          |
| Goodness-of-fit on F <sup>2</sup> | 1.098                                                         |          |
| Final R indices [I > 2σ(I)]       | R1 = 0.0533, wR2 = 0.1262                                     |          |
| R indices (all data)              | R1 = 0.0591, wR2 = 0.1293                                     |          |
| Absolute structure parameter      | 0.7(2)                                                        |          |
| Extinction coefficient            | 0.0010(3)                                                     |          |
| Largest diff. peak and hole       | 0.389 and -0.180 e.Å <sup>-3</sup>                            |          |

Table 2. Atomic coordinates ( $\times 10^4$ ) and equivalent isotropic displacement parameters ( $\text{\AA}^2 \times 10^3$ ) for (R,R)-5H.  $U(\text{eq})$  is defined as one third of the trace of the orthogonalized  $U^{ij}$  tensor.

|       | x        | y        | z       | $U(\text{eq})$ |
|-------|----------|----------|---------|----------------|
| C(1)  | 10196(8) | 2295(5)  | 640(1)  | 34(1)          |
| C(2)  | 10594(8) | 3753(5)  | 554(1)  | 40(1)          |
| C(3)  | 9081(9)  | 4560(5)  | 370(1)  | 42(1)          |
| C(4)  | 7143(9)  | 3901(5)  | 270(1)  | 42(1)          |
| C(5)  | 6745(8)  | 2458(5)  | 356(1)  | 35(1)          |
| C(6)  | 8250(7)  | 1638(5)  | 544(1)  | 27(1)          |
| C(7)  | 7783(8)  | 48(5)    | 633(1)  | 31(1)          |
| C(8)  | 7930(8)  | -1008(5) | 310(1)  | 36(1)          |
| C(9)  | 10576(7) | -1451(5) | 701(1)  | 30(1)          |
| C(10) | 13004(8) | -2130(4) | 1133(1) | 31(1)          |
| C(11) | 14906(7) | -2895(4) | 1282(1) | 31(1)          |
| C(12) | 16412(8) | -3788(5) | 1120(1) | 41(1)          |
| C(13) | 18053(9) | -4352(6) | 1332(1) | 45(1)          |
| C(14) | 18154(9) | -4048(6) | 1696(1) | 49(1)          |
| C(15) | 16630(8) | -3144(5) | 1860(1) | 42(1)          |
| C(16) | 15021(8) | -2581(4) | 1646(1) | 32(1)          |
| C(17) | 13154(8) | -1634(4) | 1733(1) | 30(1)          |
| C(18) | 10935(8) | -244(5)  | 2088(1) | 33(1)          |
| C(19) | 8280(9)  | 763(6)   | 2398(1) | 49(1)          |
| C(20) | 8671(8)  | 1564(6)  | 2060(1) | 42(1)          |
| C(21) | 6685(7)  | 2074(5)  | 1854(1) | 30(1)          |
| C(22) | 5224(8)  | 2974(5)  | 2025(1) | 41(1)          |
| C(23) | 3491(9)  | 3505(7)  | 1840(2) | 62(2)          |
| C(24) | 3159(10) | 3129(8)  | 1486(2) | 67(2)          |
| C(25) | 4631(9)  | 2212(7)  | 1321(1) | 58(2)          |
| C(26) | 6355(8)  | 1685(6)  | 1500(1) | 40(1)          |
| N(1)  | 9407(6)  | -566(4)  | 882(1)  | 32(1)          |
| N(2)  | 12420(6) | -2205(4) | 802(1)  | 32(1)          |
| N(3)  | 12090(6) | -1388(4) | 1413(1) | 31(1)          |
| N(4)  | 12655(6) | -1189(4) | 2050(1) | 35(1)          |
| N(5)  | 10115(7) | 583(4)   | 1860(1) | 41(1)          |
| O(1)  | 10038(5) | -1695(3) | 351(1)  | 34(1)          |
| O(2)  | 10197(7) | -147(4)  | 2430(1) | 53(1)          |

Table 3. Bond lengths [ $\text{\AA}$ ] and angles [ $^\circ$ ] for (R,R)-5H.

|             |          |                |          |
|-------------|----------|----------------|----------|
| C(1)-H(1)   | 0.9500   | C(19)-H(19A)   | 0.9900   |
| C(1)-C(2)   | 1.387(7) | C(19)-H(19B)   | 0.9900   |
| C(1)-C(6)   | 1.388(6) | C(19)-C(20)    | 1.475(7) |
| C(2)-H(2)   | 0.9500   | C(19)-O(2)     | 1.450(6) |
| C(2)-C(3)   | 1.373(7) | C(20)-H(20)    | 1.0000   |
| C(3)-H(3)   | 0.9500   | C(20)-C(21)    | 1.519(7) |
| C(3)-C(4)   | 1.390(7) | C(20)-N(5)     | 1.466(6) |
| C(4)-H(4)   | 0.9500   | C(21)-C(22)    | 1.377(6) |
| C(4)-C(5)   | 1.376(7) | C(21)-C(26)    | 1.379(6) |
| C(5)-H(5)   | 0.9500   | C(22)-H(22)    | 0.9500   |
| C(5)-C(6)   | 1.382(6) | C(22)-C(23)    | 1.361(7) |
| C(6)-C(7)   | 1.513(6) | C(23)-H(23)    | 0.9500   |
| C(7)-H(7)   | 1.0000   | C(23)-C(24)    | 1.380(8) |
| C(7)-C(8)   | 1.544(6) | C(24)-H(24)    | 0.9500   |
| C(7)-N(1)   | 1.475(6) | C(24)-C(25)    | 1.379(8) |
| C(8)-H(8A)  | 0.9900   | C(25)-H(25)    | 0.9500   |
| C(8)-H(8B)  | 0.9900   | C(25)-C(26)    | 1.345(7) |
| C(8)-O(1)   | 1.452(6) | C(26)-H(26)    | 0.9500   |
| C(9)-N(1)   | 1.274(5) | N(3)-H(3A)     | 0.8800   |
| C(9)-N(2)   | 1.382(6) |                |          |
| C(9)-O(1)   | 1.362(5) | C(2)-C(1)-H(1) | 119.8    |
| C(10)-C(11) | 1.474(6) | C(2)-C(1)-C(6) | 120.5(5) |
| C(10)-N(2)  | 1.285(5) | C(6)-C(1)-H(1) | 119.8    |
| C(10)-N(3)  | 1.366(5) | C(1)-C(2)-H(2) | 119.8    |
| C(11)-C(12) | 1.376(6) | C(3)-C(2)-C(1) | 120.5(5) |
| C(11)-C(16) | 1.387(6) | C(3)-C(2)-H(2) | 119.8    |
| C(12)-H(12) | 0.9500   | C(2)-C(3)-H(3) | 120.4    |
| C(12)-C(13) | 1.385(7) | C(2)-C(3)-C(4) | 119.3(4) |
| C(13)-H(13) | 0.9500   | C(4)-C(3)-H(3) | 120.4    |
| C(13)-C(14) | 1.386(7) | C(3)-C(4)-H(4) | 119.9    |
| C(14)-H(14) | 0.9500   | C(5)-C(4)-C(3) | 120.2(5) |
| C(14)-C(15) | 1.391(7) | C(5)-C(4)-H(4) | 119.9    |
| C(15)-H(15) | 0.9500   | C(4)-C(5)-H(5) | 119.5    |
| C(15)-C(16) | 1.373(6) | C(4)-C(5)-C(6) | 121.0(5) |
| C(16)-C(17) | 1.476(6) | C(6)-C(5)-H(5) | 119.5    |
| C(17)-N(3)  | 1.380(5) | C(1)-C(6)-C(7) | 121.4(4) |
| C(17)-N(4)  | 1.283(5) | C(5)-C(6)-C(1) | 118.6(4) |
| C(18)-N(4)  | 1.374(6) | C(5)-C(6)-C(7) | 120.0(4) |
| C(18)-N(5)  | 1.243(6) | C(6)-C(7)-H(7) | 109.3    |
| C(18)-O(2)  | 1.359(5) | C(6)-C(7)-C(8) | 114.5(3) |



|                     |          |                   |          |
|---------------------|----------|-------------------|----------|
| C(8)-C(7)-H(7)      | 109.3    | O(2)-C(19)-H(19A) | 111.2    |
| N(1)-C(7)-C(6)      | 111.7(4) | O(2)-C(19)-H(19B) | 111.2    |
| N(1)-C(7)-H(7)      | 109.3    | O(2)-C(19)-C(20)  | 102.8(4) |
| N(1)-C(7)-C(8)      | 102.3(4) | C(19)-C(20)-H(20) | 107.1    |
| C(7)-C(8)-H(8A)     | 111.0    | C(19)-C(20)-C(21) | 116.8(4) |
| C(7)-C(8)-H(8B)     | 111.0    | C(21)-C(20)-H(20) | 107.1    |
| H(8A)-C(8)-H(8B)    | 109.0    | N(5)-C(20)-C(19)  | 103.5(4) |
| O(1)-C(8)-C(7)      | 103.8(3) | N(5)-C(20)-H(20)  | 107.1    |
| O(1)-C(8)-H(8A)     | 111.0    | N(5)-C(20)-C(21)  | 114.8(4) |
| O(1)-C(8)-H(8B)     | 111.0    | C(22)-C(21)-C(20) | 118.4(4) |
| N(1)-C(9)-N(2)      | 129.5(4) | C(22)-C(21)-C(26) | 120.0(4) |
| N(1)-C(9)-O(1)      | 118.1(4) | C(26)-C(21)-C(20) | 121.6(4) |
| O(1)-C(9)-N(2)      | 112.4(4) | C(21)-C(22)-H(22) | 120.3    |
| N(2)-C(10)-C(11)    | 124.1(4) | C(23)-C(22)-C(21) | 119.4(4) |
| N(2)-C(10)-N(3)     | 130.0(4) | C(23)-C(22)-H(22) | 120.3    |
| N(3)-C(10)-C(11)    | 105.9(3) | C(22)-C(23)-H(23) | 119.6    |
| C(12)-C(11)-C(10)   | 130.6(4) | C(22)-C(23)-C(24) | 120.9(5) |
| C(12)-C(11)-C(16)   | 121.2(4) | C(24)-C(23)-H(23) | 119.6    |
| C(16)-C(11)-C(10)   | 108.2(4) | C(23)-C(24)-H(24) | 120.7    |
| C(11)-C(12)-H(12)   | 121.2    | C(25)-C(24)-C(23) | 118.6(5) |
| C(11)-C(12)-C(13)   | 117.5(4) | C(25)-C(24)-H(24) | 120.7    |
| C(13)-C(12)-H(12)   | 121.2    | C(24)-C(25)-H(25) | 119.4    |
| C(12)-C(13)-H(13)   | 119.4    | C(26)-C(25)-C(24) | 121.1(5) |
| C(12)-C(13)-C(14)   | 121.2(5) | C(26)-C(25)-H(25) | 119.4    |
| C(14)-C(13)-H(13)   | 119.4    | C(21)-C(26)-H(26) | 120.0    |
| C(13)-C(14)-H(14)   | 119.4    | C(25)-C(26)-C(21) | 119.9(5) |
| C(13)-C(14)-C(15)   | 121.2(5) | C(25)-C(26)-H(26) | 120.0    |
| C(15)-C(14)-H(14)   | 119.4    | C(9)-N(1)-C(7)    | 107.0(3) |
| C(14)-C(15)-H(15)   | 121.5    | C(10)-N(2)-C(9)   | 117.8(4) |
| C(16)-C(15)-C(14)   | 117.1(4) | C(10)-N(3)-C(17)  | 112.6(4) |
| C(16)-C(15)-H(15)   | 121.5    | C(10)-N(3)-H(3A)  | 123.7    |
| C(11)-C(16)-C(17)   | 107.2(4) | C(17)-N(3)-H(3A)  | 123.7    |
| C(15)-C(16)-C(11)   | 121.9(4) | C(17)-N(4)-C(18)  | 118.5(4) |
| C(15)-C(16)-C(17)   | 130.9(4) | C(18)-N(5)-C(20)  | 105.6(4) |
| N(3)-C(17)-C(16)    | 106.0(3) | C(9)-O(1)-C(8)    | 104.5(3) |
| N(4)-C(17)-C(16)    | 125.1(4) | C(18)-O(2)-C(19)  | 103.4(3) |
| N(4)-C(17)-N(3)     | 128.9(4) |                   |          |
| N(5)-C(18)-N(4)     | 128.6(4) |                   |          |
| N(5)-C(18)-O(2)     | 117.8(4) |                   |          |
| O(2)-C(18)-N(4)     | 113.3(4) |                   |          |
| H(19A)-C(19)-H(19B) | 109.1    |                   |          |
| C(20)-C(19)-H(19A)  | 111.2    |                   |          |
| C(20)-C(19)-H(19B)  | 111.2    |                   |          |

Table 4. Anisotropic displacement parameters ( $\text{\AA}^2 \times 10^3$ ) for (R,R)-5H. The anisotropic displacement factor exponent takes the form:  $-2\pi^2 [ h^2 a^{*2} U^{11} + \dots + 2 h k a^* b^* U^{12} ]$

|       | U <sup>11</sup> | U <sup>22</sup> | U <sup>33</sup> | U <sup>23</sup> | U <sup>13</sup> | U <sup>12</sup> |
|-------|-----------------|-----------------|-----------------|-----------------|-----------------|-----------------|
| C(1)  | 34(3)           | 36(2)           | 33(2)           | -2(2)           | -1(2)           | 2(2)            |
| C(2)  | 41(3)           | 39(3)           | 42(2)           | -11(2)          | 7(2)            | -5(2)           |
| C(3)  | 66(4)           | 26(2)           | 32(2)           | -2(2)           | 13(2)           | 1(3)            |
| C(4)  | 61(3)           | 31(2)           | 32(2)           | 1(2)            | 2(2)            | 18(3)           |
| C(5)  | 44(3)           | 33(2)           | 28(2)           | -4(2)           | -5(2)           | 7(2)            |
| C(6)  | 33(2)           | 29(2)           | 18(2)           | -3(2)           | 1(2)            | 2(2)            |
| C(7)  | 33(2)           | 29(2)           | 30(2)           | 1(2)            | 0(2)            | 1(2)            |
| C(8)  | 44(3)           | 26(2)           | 38(2)           | 1(2)            | -9(2)           | -3(2)           |
| C(9)  | 38(3)           | 24(2)           | 26(2)           | 3(2)            | 5(2)            | 0(2)            |
| C(10) | 43(3)           | 25(2)           | 25(2)           | 0(2)            | 3(2)            | -7(2)           |
| C(11) | 38(3)           | 24(2)           | 32(2)           | 4(2)            | 7(2)            | 6(2)            |
| C(12) | 47(3)           | 37(3)           | 37(2)           | -1(2)           | 6(2)            | 8(3)            |
| C(13) | 45(3)           | 44(3)           | 48(3)           | 3(2)            | 6(2)            | 17(3)           |
| C(14) | 50(3)           | 46(3)           | 51(3)           | 7(2)            | -3(3)           | 16(3)           |
| C(15) | 51(3)           | 42(3)           | 33(2)           | 2(2)            | 0(2)            | 6(3)            |
| C(16) | 41(3)           | 22(2)           | 35(2)           | 3(2)            | 2(2)            | 0(2)            |
| C(17) | 39(3)           | 22(2)           | 29(2)           | 4(2)            | -1(2)           | -2(2)           |
| C(18) | 47(3)           | 24(2)           | 26(2)           | -1(2)           | -1(2)           | 4(2)            |
| C(19) | 60(3)           | 60(3)           | 27(2)           | 0(2)            | 3(2)            | 27(3)           |
| C(20) | 47(3)           | 41(3)           | 39(3)           | -3(2)           | 1(2)            | 9(3)            |
| C(21) | 28(2)           | 26(2)           | 34(2)           | 0(2)            | 3(2)            | 6(2)            |
| C(22) | 43(3)           | 44(3)           | 37(2)           | -5(2)           | -1(2)           | 3(3)            |
| C(23) | 49(3)           | 78(4)           | 59(3)           | -20(3)          | 5(3)            | 19(3)           |
| C(24) | 49(3)           | 102(5)          | 51(3)           | -11(3)          | -10(3)          | 30(4)           |
| C(25) | 50(3)           | 84(4)           | 39(3)           | -14(3)          | -2(3)           | 20(3)           |
| C(26) | 45(3)           | 43(3)           | 32(2)           | 0(2)            | 6(2)            | 9(2)            |
| N(1)  | 38(2)           | 30(2)           | 27(2)           | 4(2)            | 3(2)            | 2(2)            |
| N(2)  | 42(2)           | 28(2)           | 27(2)           | 1(1)            | 2(2)            | 4(2)            |
| N(3)  | 37(2)           | 27(2)           | 28(2)           | 4(1)            | 1(2)            | 9(2)            |
| N(4)  | 45(2)           | 35(2)           | 25(2)           | 0(2)            | -2(2)           | 8(2)            |
| N(5)  | 49(2)           | 43(2)           | 31(2)           | 5(2)            | -1(2)           | 17(2)           |
| O(1)  | 46(2)           | 28(2)           | 28(1)           | -5(1)           | -4(1)           | 4(2)            |
| O(2)  | 68(2)           | 68(2)           | 22(2)           | 1(2)            | 4(2)            | 33(2)           |

Table 5. Hydrogen coordinates ( $\times 10^4$ ) and isotropic displacement parameters ( $\text{\AA}^2 \times 10^{-3}$ ) for (R,R)-5H.

|        | x     | y     | z    | U(eq) |
|--------|-------|-------|------|-------|
| H(1)   | 11262 | 1743  | 765  | 41    |
| H(2)   | 11923 | 4195  | 624  | 48    |
| H(3)   | 9355  | 5558  | 312  | 50    |
| H(4)   | 6089  | 4450  | 141  | 50    |
| H(5)   | 5416  | 2018  | 286  | 42    |
| H(7)   | 6312  | -30   | 744  | 37    |
| H(8A)  | 6757  | -1749 | 318  | 44    |
| H(8B)  | 7840  | -464  | 80   | 44    |
| H(12)  | 16328 | -4010 | 871  | 49    |
| H(13)  | 19130 | -4960 | 1226 | 54    |
| H(14)  | 19285 | -4463 | 1836 | 59    |
| H(15)  | 16699 | -2927 | 2109 | 50    |
| H(19A) | 8149  | 1448  | 2603 | 59    |
| H(19B) | 6952  | 158   | 2383 | 59    |
| H(20)  | 9527  | 2460  | 2122 | 51    |
| H(22)  | 5423  | 3222  | 2271 | 49    |
| H(23)  | 2498  | 4144  | 1957 | 74    |
| H(24)  | 1941  | 3493  | 1358 | 81    |
| H(25)  | 4425  | 1948  | 1077 | 69    |
| H(26)  | 7344  | 1044  | 1383 | 48    |
| H(3A)  | 10948 | -817  | 1392 | 37    |

XRD data for (S,S)-6H

Table 1. Crystal data and structure refinement for (S,S)-6H.

|                                   |                                                               |                  |
|-----------------------------------|---------------------------------------------------------------|------------------|
| Identification code               | daley13                                                       |                  |
| Empirical formula                 | C <sub>20</sub> H <sub>25</sub> N <sub>5</sub> O <sub>2</sub> |                  |
| Formula weight                    | 367.45                                                        |                  |
| Temperature                       | 100.0 K                                                       |                  |
| Wavelength                        | 1.54184 Å                                                     |                  |
| Crystal system                    | Triclinic                                                     |                  |
| Space group                       | P 1                                                           |                  |
| Unit cell dimensions              | a = 9.2785(4) Å                                               | α = 100.313(2)°. |
|                                   | b = 10.8229(4) Å                                              | β = 109.063(2)°. |
|                                   | c = 11.2472(4) Å                                              | γ = 110.537(2)°. |
| Volume                            | 943.06(7) Å <sup>3</sup>                                      |                  |
| Z                                 | 2                                                             |                  |
| Density (calculated)              | 1.294 Mg/m <sup>3</sup>                                       |                  |
| Absorption coefficient            | 0.697 mm <sup>-1</sup>                                        |                  |
| F(000)                            | 392                                                           |                  |
| Crystal size                      | 0.17 x 0.13 x 0.08 mm <sup>3</sup>                            |                  |
| Theta range for data collection   | 4.409 to 68.099°.                                             |                  |
| Index ranges                      | -11 ≤ h ≤ 10, -12 ≤ k ≤ 12, -13 ≤ l ≤ 13                      |                  |
| Reflections collected             | 10393                                                         |                  |
| Independent reflections           | 4863 [R(int) = 0.0225]                                        |                  |
| Completeness to theta = 67.684°   | 94.1 %                                                        |                  |
| Absorption correction             | Semi-empirical from equivalents                               |                  |
| Max. and min. transmission        | 0.744 and 0.701                                               |                  |
| Refinement method                 | Full-matrix least-squares on F <sup>2</sup>                   |                  |
| Data / restraints / parameters    | 4863 / 5 / 503                                                |                  |
| Goodness-of-fit on F <sup>2</sup> | 1.054                                                         |                  |
| Final R indices [I > 2σ(I)]       | R1 = 0.0299, wR2 = 0.0730                                     |                  |
| R indices (all data)              | R1 = 0.0323, wR2 = 0.0750                                     |                  |
| Absolute structure parameter      | 0.21(15)                                                      |                  |
| Extinction coefficient            | n/a                                                           |                  |
| Largest diff. peak and hole       | 0.151 and -0.169 e.Å <sup>-3</sup>                            |                  |

Table 2. Atomic coordinates ( $\times 10^4$ ) and equivalent isotropic displacement parameters ( $\text{\AA}^2 \times 10^3$ ) for (S,S)-6H.  $U(\text{eq})$  is defined as one third of the trace of the orthogonalized  $U^{ij}$  tensor.

|       | x        | y        | z        | $U(\text{eq})$ |
|-------|----------|----------|----------|----------------|
| O(1)  | 14341(3) | 3117(2)  | 11108(2) | 29(1)          |
| O(2)  | 14764(3) | -289(2)  | 6665(2)  | 26(1)          |
| N(1)  | 14792(3) | 2231(2)  | 9355(2)  | 24(1)          |
| N(2)  | 13380(3) | 745(3)   | 10378(2) | 24(1)          |
| N(3)  | 13663(3) | -529(3)  | 8551(2)  | 22(1)          |
| N(4)  | 13594(3) | -2463(2) | 7004(2)  | 23(1)          |
| N(5)  | 14797(3) | -2206(3) | 5487(2)  | 26(1)          |
| C(1)  | 15811(4) | 3519(3)  | 7494(3)  | 32(1)          |
| C(2)  | 16115(4) | 5808(3)  | 8848(3)  | 31(1)          |
| C(3)  | 15257(3) | 4211(3)  | 8454(3)  | 25(1)          |
| C(4)  | 15615(4) | 3769(3)  | 9682(3)  | 24(1)          |
| C(5)  | 14925(4) | 4282(3)  | 10640(3) | 28(1)          |
| C(6)  | 14177(3) | 2000(3)  | 10202(3) | 22(1)          |
| C(7)  | 13180(3) | -381(3)  | 9581(3)  | 22(1)          |
| C(8)  | 12379(3) | -1794(3) | 9645(3)  | 23(1)          |
| C(9)  | 11628(4) | -2259(3) | 10457(3) | 25(1)          |
| C(10) | 10984(4) | -3679(3) | 10279(3) | 28(1)          |
| C(11) | 11101(4) | -4607(3) | 9314(3)  | 27(1)          |
| C(12) | 11859(4) | -4134(3) | 8502(3)  | 25(1)          |
| C(13) | 12488(3) | -2719(3) | 8673(3)  | 23(1)          |
| C(14) | 13307(3) | -1911(3) | 7957(3)  | 22(1)          |
| C(15) | 14379(3) | -1689(3) | 6344(3)  | 21(1)          |
| C(16) | 15509(4) | 201(3)   | 5785(3)  | 26(1)          |
| C(17) | 15702(3) | -1056(3) | 5083(3)  | 24(1)          |
| C(18) | 15047(4) | -1405(3) | 3579(3)  | 26(1)          |
| C(19) | 15226(5) | -2679(3) | 2942(3)  | 36(1)          |
| C(20) | 15990(4) | -151(3)  | 3240(3)  | 33(1)          |
| O(1') | 10214(3) | -3442(2) | 2932(2)  | 33(1)          |
| O(2') | 9906(2)  | -1(2)    | 7442(2)  | 25(1)          |
| N(1') | 10080(3) | -2511(2) | 4835(2)  | 26(1)          |
| N(2') | 11019(3) | -1094(3) | 3574(2)  | 26(1)          |
| N(3') | 10710(3) | 180(3)   | 5392(2)  | 22(1)          |
| N(4') | 10765(3) | 2107(3)  | 6933(2)  | 24(1)          |
| N(5') | 10124(3) | 1972(2)  | 8756(2)  | 25(1)          |
| C(1') | 7855(4)  | -3870(3) | 6014(3)  | 33(1)          |

|        |          |          |          |       |
|--------|----------|----------|----------|-------|
| C(2')  | 7503(4)  | -6205(3) | 4725(3)  | 35(1) |
| C(3')  | 7870(4)  | -4695(3) | 4770(3)  | 27(1) |
| C(4')  | 9561(3)  | -4000(3) | 4698(3)  | 24(1) |
| C(5')  | 9555(4)  | -4627(3) | 3345(3)  | 29(1) |
| C(6')  | 10418(3) | -2318(3) | 3859(3)  | 24(1) |
| C(7')  | 11142(3) | 27(3)    | 4330(3)  | 23(1) |
| C(8')  | 11785(3) | 1413(3)  | 4185(3)  | 22(1) |
| C(9')  | 12498(3) | 1872(3)  | 3344(3)  | 26(1) |
| C(10') | 13073(4) | 3286(3)  | 3497(3)  | 26(1) |
| C(11') | 12940(4) | 4206(3)  | 4446(3)  | 26(1) |
| C(12') | 12210(4) | 3732(3)  | 5275(3)  | 25(1) |
| C(13') | 11644(3) | 2326(3)  | 5133(3)  | 23(1) |
| C(14') | 10972(3) | 1540(3)  | 5933(3)  | 22(1) |
| C(15') | 10254(3) | 1392(3)  | 7737(3)  | 22(1) |
| C(16') | 9176(4)  | -461(3)  | 8343(3)  | 24(1) |
| C(17') | 9649(3)  | 908(3)   | 9393(3)  | 22(1) |
| C(18') | 8240(3)  | 887(3)   | 9814(3)  | 24(1) |
| C(19') | 8784(4)  | 2288(3)  | 10832(3) | 30(1) |
| C(20') | 7743(4)  | -301(3)  | 10375(3) | 32(1) |

---

Table 3. Bond lengths [ $\text{\AA}$ ] and angles [ $^\circ$ ] for (S,S)-6H.

|             |          |              |          |
|-------------|----------|--------------|----------|
| O(1)-C(5)   | 1.451(4) | C(13)-C(14)  | 1.475(4) |
| O(1)-C(6)   | 1.361(4) | C(16)-H(16A) | 0.9900   |
| O(2)-C(15)  | 1.376(3) | C(16)-H(16B) | 0.9900   |
| O(2)-C(16)  | 1.454(3) | C(16)-C(17)  | 1.543(4) |
| N(1)-C(4)   | 1.482(4) | C(17)-H(17)  | 1.0000   |
| N(1)-C(6)   | 1.279(3) | C(17)-C(18)  | 1.521(4) |
| N(2)-C(6)   | 1.385(4) | C(18)-H(18)  | 1.0000   |
| N(2)-C(7)   | 1.290(4) | C(18)-C(19)  | 1.526(4) |
| N(3)-H(3)   | 0.88(2)  | C(18)-C(20)  | 1.524(4) |
| N(3)-C(7)   | 1.376(4) | C(19)-H(19A) | 0.9800   |
| N(3)-C(14)  | 1.394(4) | C(19)-H(19B) | 0.9800   |
| N(4)-C(14)  | 1.283(4) | C(19)-H(19C) | 0.9800   |
| N(4)-C(15)  | 1.389(3) | C(20)-H(20A) | 0.9800   |
| N(5)-C(15)  | 1.264(4) | C(20)-H(20B) | 0.9800   |
| N(5)-C(17)  | 1.476(3) | C(20)-H(20C) | 0.9800   |
| C(1)-H(1A)  | 0.9800   | O(1')-C(5')  | 1.444(4) |
| C(1)-H(1B)  | 0.9800   | O(1')-C(6')  | 1.363(4) |
| C(1)-H(1C)  | 0.9800   | O(2')-C(15') | 1.377(3) |
| C(1)-C(3)   | 1.528(4) | O(2')-C(16') | 1.457(3) |
| C(2)-H(2A)  | 0.9800   | N(1')-C(4')  | 1.473(4) |
| C(2)-H(2B)  | 0.9800   | N(1')-C(6')  | 1.268(3) |
| C(2)-H(2C)  | 0.9800   | N(2')-C(6')  | 1.385(4) |
| C(2)-C(3)   | 1.532(4) | N(2')-C(7')  | 1.295(4) |
| C(3)-H(3A)  | 1.0000   | N(3')-H(3')  | 0.89(2)  |
| C(3)-C(4)   | 1.516(4) | N(3')-C(7')  | 1.381(4) |
| C(4)-H(4)   | 1.0000   | N(3')-C(14') | 1.388(4) |
| C(4)-C(5)   | 1.538(4) | N(4')-C(14') | 1.287(4) |
| C(5)-H(5A)  | 0.9900   | N(4')-C(15') | 1.384(3) |
| C(5)-H(5B)  | 0.9900   | N(5')-C(15') | 1.269(4) |
| C(7)-C(8)   | 1.474(4) | N(5')-C(17') | 1.476(3) |
| C(8)-C(9)   | 1.381(4) | C(1')-H(1'A) | 0.9800   |
| C(8)-C(13)  | 1.400(4) | C(1')-H(1'B) | 0.9800   |
| C(9)-H(9)   | 0.9500   | C(1')-H(1'C) | 0.9800   |
| C(9)-C(10)  | 1.388(4) | C(1')-C(3')  | 1.527(4) |
| C(10)-H(10) | 0.9500   | C(2')-H(2'A) | 0.9800   |
| C(10)-C(11) | 1.401(4) | C(2')-H(2'B) | 0.9800   |
| C(11)-H(11) | 0.9500   | C(2')-H(2'C) | 0.9800   |
| C(11)-C(12) | 1.387(4) | C(2')-C(3')  | 1.535(4) |
| C(12)-H(12) | 0.9500   | C(3')-H(3'A) | 1.0000   |
| C(12)-C(13) | 1.384(4) | C(3')-C(4')  | 1.520(4) |

|                  |          |                   |          |
|------------------|----------|-------------------|----------|
| C(4')-H(4')      | 1.0000   | C(3)-C(1)-H(1A)   | 109.5    |
| C(4')-C(5')      | 1.548(4) | C(3)-C(1)-H(1B)   | 109.5    |
| C(5')-H(5'A)     | 0.9900   | C(3)-C(1)-H(1C)   | 109.5    |
| C(5')-H(5'B)     | 0.9900   | H(2A)-C(2)-H(2B)  | 109.5    |
| C(7')-C(8')      | 1.468(4) | H(2A)-C(2)-H(2C)  | 109.5    |
| C(8')-C(9')      | 1.387(4) | H(2B)-C(2)-H(2C)  | 109.5    |
| C(8')-C(13')     | 1.391(4) | C(3)-C(2)-H(2A)   | 109.5    |
| C(9')-H(9')      | 0.9500   | C(3)-C(2)-H(2B)   | 109.5    |
| C(9')-C(10')     | 1.390(4) | C(3)-C(2)-H(2C)   | 109.5    |
| C(10')-H(10')    | 0.9500   | C(1)-C(3)-C(2)    | 111.8(2) |
| C(10')-C(11')    | 1.392(4) | C(1)-C(3)-H(3A)   | 108.0    |
| C(11')-H(11')    | 0.9500   | C(2)-C(3)-H(3A)   | 108.0    |
| C(11')-C(12')    | 1.390(4) | C(4)-C(3)-C(1)    | 110.5(2) |
| C(12')-H(12')    | 0.9500   | C(4)-C(3)-C(2)    | 110.6(2) |
| C(12')-C(13')    | 1.384(4) | C(4)-C(3)-H(3A)   | 108.0    |
| C(13')-C(14')    | 1.479(4) | N(1)-C(4)-C(3)    | 112.7(2) |
| C(16')-H(16C)    | 0.9900   | N(1)-C(4)-H(4)    | 108.9    |
| C(16')-H(16D)    | 0.9900   | N(1)-C(4)-C(5)    | 102.9(2) |
| C(16')-C(17')    | 1.536(4) | C(3)-C(4)-H(4)    | 108.9    |
| C(17')-H(17')    | 1.0000   | C(3)-C(4)-C(5)    | 114.4(2) |
| C(17')-C(18')    | 1.524(3) | C(5)-C(4)-H(4)    | 108.9    |
| C(18')-H(18')    | 1.0000   | O(1)-C(5)-C(4)    | 103.7(2) |
| C(18')-C(19')    | 1.526(4) | O(1)-C(5)-H(5A)   | 111.0    |
| C(18')-C(20')    | 1.526(4) | O(1)-C(5)-H(5B)   | 111.0    |
| C(19')-H(19D)    | 0.9800   | C(4)-C(5)-H(5A)   | 111.0    |
| C(19')-H(19E)    | 0.9800   | C(4)-C(5)-H(5B)   | 111.0    |
| C(19')-H(19F)    | 0.9800   | H(5A)-C(5)-H(5B)  | 109.0    |
| C(20')-H(20D)    | 0.9800   | O(1)-C(6)-N(2)    | 112.6(2) |
| C(20')-H(20E)    | 0.9800   | N(1)-C(6)-O(1)    | 118.1(3) |
| C(20')-H(20F)    | 0.9800   | N(1)-C(6)-N(2)    | 129.3(3) |
|                  |          | N(2)-C(7)-N(3)    | 128.9(3) |
| C(6)-O(1)-C(5)   | 104.8(2) | N(2)-C(7)-C(8)    | 124.4(3) |
| C(15)-O(2)-C(16) | 105.3(2) | N(3)-C(7)-C(8)    | 106.6(2) |
| C(6)-N(1)-C(4)   | 106.5(2) | C(9)-C(8)-C(7)    | 131.3(3) |
| C(7)-N(2)-C(6)   | 117.7(2) | C(9)-C(8)-C(13)   | 121.4(3) |
| C(7)-N(3)-H(3)   | 123(2)   | C(13)-C(8)-C(7)   | 107.3(2) |
| C(7)-N(3)-C(14)  | 112.2(2) | C(8)-C(9)-H(9)    | 121.1    |
| C(14)-N(3)-H(3)  | 125(2)   | C(8)-C(9)-C(10)   | 117.7(3) |
| C(14)-N(4)-C(15) | 122.7(2) | C(10)-C(9)-H(9)   | 121.1    |
| C(15)-N(5)-C(17) | 107.3(2) | C(9)-C(10)-H(10)  | 119.4    |
| H(1A)-C(1)-H(1B) | 109.5    | C(9)-C(10)-C(11)  | 121.1(3) |
| H(1A)-C(1)-H(1C) | 109.5    | C(11)-C(10)-H(10) | 119.4    |
| H(1B)-C(1)-H(1C) | 109.5    | C(10)-C(11)-H(11) | 119.6    |



|                     |          |                     |          |
|---------------------|----------|---------------------|----------|
| C(12)-C(11)-C(10)   | 120.9(3) | H(20B)-C(20)-H(20C) | 109.5    |
| C(12)-C(11)-H(11)   | 119.6    | C(6')-O(1')-C(5')   | 105.5(2) |
| C(11)-C(12)-H(12)   | 121.0    | C(15')-O(2')-C(16') | 104.3(2) |
| C(13)-C(12)-C(11)   | 118.0(3) | C(6')-N(1')-C(4')   | 107.8(2) |
| C(13)-C(12)-H(12)   | 121.0    | C(7')-N(2')-C(6')   | 117.7(3) |
| C(8)-C(13)-C(14)    | 108.2(2) | C(7')-N(3')-H(3')   | 119(2)   |
| C(12)-C(13)-C(8)    | 120.9(3) | C(7')-N(3')-C(14')  | 112.0(2) |
| C(12)-C(13)-C(14)   | 130.9(3) | C(14')-N(3')-H(3')  | 129(2)   |
| N(3)-C(14)-C(13)    | 105.6(2) | C(14')-N(4')-C(15') | 123.0(2) |
| N(4)-C(14)-N(3)     | 131.1(3) | C(15')-N(5')-C(17') | 107.0(2) |
| N(4)-C(14)-C(13)    | 123.3(3) | H(1'A)-C(1')-H(1'B) | 109.5    |
| O(2)-C(15)-N(4)     | 118.7(2) | H(1'A)-C(1')-H(1'C) | 109.5    |
| N(5)-C(15)-O(2)     | 118.4(2) | H(1'B)-C(1')-H(1'C) | 109.5    |
| N(5)-C(15)-N(4)     | 122.8(3) | C(3')-C(1')-H(1'A)  | 109.5    |
| O(2)-C(16)-H(16A)   | 110.9    | C(3')-C(1')-H(1'B)  | 109.5    |
| O(2)-C(16)-H(16B)   | 110.9    | C(3')-C(1')-H(1'C)  | 109.5    |
| O(2)-C(16)-C(17)    | 104.2(2) | H(2'A)-C(2')-H(2'B) | 109.5    |
| H(16A)-C(16)-H(16B) | 108.9    | H(2'A)-C(2')-H(2'C) | 109.5    |
| C(17)-C(16)-H(16A)  | 110.9    | H(2'B)-C(2')-H(2'C) | 109.5    |
| C(17)-C(16)-H(16B)  | 110.9    | C(3')-C(2')-H(2'A)  | 109.5    |
| N(5)-C(17)-C(16)    | 104.0(2) | C(3')-C(2')-H(2'B)  | 109.5    |
| N(5)-C(17)-H(17)    | 108.5    | C(3')-C(2')-H(2'C)  | 109.5    |
| N(5)-C(17)-C(18)    | 113.2(2) | C(1')-C(3')-C(2')   | 111.3(2) |
| C(16)-C(17)-H(17)   | 108.5    | C(1')-C(3')-H(3'A)  | 108.2    |
| C(18)-C(17)-C(16)   | 113.9(2) | C(2')-C(3')-H(3'A)  | 108.2    |
| C(18)-C(17)-H(17)   | 108.5    | C(4')-C(3')-C(1')   | 111.3(2) |
| C(17)-C(18)-H(18)   | 108.4    | C(4')-C(3')-C(2')   | 109.3(2) |
| C(17)-C(18)-C(19)   | 111.3(2) | C(4')-C(3')-H(3'A)  | 108.2    |
| C(17)-C(18)-C(20)   | 110.2(2) | N(1')-C(4')-C(3')   | 113.1(2) |
| C(19)-C(18)-H(18)   | 108.4    | N(1')-C(4')-H(4')   | 108.8    |
| C(20)-C(18)-H(18)   | 108.4    | N(1')-C(4')-C(5')   | 103.1(2) |
| C(20)-C(18)-C(19)   | 110.2(2) | C(3')-C(4')-H(4')   | 108.8    |
| C(18)-C(19)-H(19A)  | 109.5    | C(3')-C(4')-C(5')   | 113.9(2) |
| C(18)-C(19)-H(19B)  | 109.5    | C(5')-C(4')-H(4')   | 108.8    |
| C(18)-C(19)-H(19C)  | 109.5    | O(1')-C(5')-C(4')   | 105.0(2) |
| H(19A)-C(19)-H(19B) | 109.5    | O(1')-C(5')-H(5'A)  | 110.8    |
| H(19A)-C(19)-H(19C) | 109.5    | O(1')-C(5')-H(5'B)  | 110.8    |
| H(19B)-C(19)-H(19C) | 109.5    | C(4')-C(5')-H(5'A)  | 110.8    |
| C(18)-C(20)-H(20A)  | 109.5    | C(4')-C(5')-H(5'B)  | 110.8    |
| C(18)-C(20)-H(20B)  | 109.5    | H(5'A)-C(5')-H(5'B) | 108.8    |
| C(18)-C(20)-H(20C)  | 109.5    | O(1')-C(6')-N(2')   | 112.1(2) |
| H(20A)-C(20)-H(20B) | 109.5    | N(1')-C(6')-O(1')   | 118.3(3) |
| H(20A)-C(20)-H(20C) | 109.5    | N(1')-C(6')-N(2')   | 129.7(3) |

|                      |          |                      |          |
|----------------------|----------|----------------------|----------|
| N(2')-C(7')-N(3')    | 128.6(3) | C(20')-C(18')-H(18') | 108.4    |
| N(2')-C(7')-C(8')    | 124.8(3) | C(20')-C(18')-C(19') | 110.7(2) |
| N(3')-C(7')-C(8')    | 106.6(2) | C(18')-C(19')-H(19D) | 109.5    |
| C(9')-C(8')-C(7')    | 130.7(3) | C(18')-C(19')-H(19E) | 109.5    |
| C(9')-C(8')-C(13')   | 121.6(3) | C(18')-C(19')-H(19F) | 109.5    |
| C(13')-C(8')-C(7')   | 107.7(2) | H(19D)-C(19')-H(19E) | 109.5    |
| C(8')-C(9')-H(9')    | 121.5    | H(19D)-C(19')-H(19F) | 109.5    |
| C(8')-C(9')-C(10')   | 116.9(3) | H(19E)-C(19')-H(19F) | 109.5    |
| C(10')-C(9')-H(9')   | 121.5    | C(18')-C(20')-H(20D) | 109.5    |
| C(9')-C(10')-H(10')  | 119.1    | C(18')-C(20')-H(20E) | 109.5    |
| C(9')-C(10')-C(11')  | 121.9(3) | C(18')-C(20')-H(20F) | 109.5    |
| C(11')-C(10')-H(10') | 119.1    | H(20D)-C(20')-H(20E) | 109.5    |
| C(10')-C(11')-H(11') | 119.7    | H(20D)-C(20')-H(20F) | 109.5    |
| C(12')-C(11')-C(10') | 120.7(3) | H(20E)-C(20')-H(20F) | 109.5    |
| C(12')-C(11')-H(11') | 119.7    |                      |          |
| C(11')-C(12')-H(12') | 121.1    |                      |          |
| C(13')-C(12')-C(11') | 117.8(3) |                      |          |
| C(13')-C(12')-H(12') | 121.1    |                      |          |
| C(8')-C(13')-C(14')  | 108.0(3) |                      |          |
| C(12')-C(13')-C(8')  | 121.2(3) |                      |          |
| C(12')-C(13')-C(14') | 130.6(3) |                      |          |
| N(3')-C(14')-C(13')  | 105.7(2) |                      |          |
| N(4')-C(14')-N(3')   | 131.0(3) |                      |          |
| N(4')-C(14')-C(13')  | 123.3(3) |                      |          |
| O(2')-C(15')-N(4')   | 119.0(2) |                      |          |
| N(5')-C(15')-O(2')   | 118.2(2) |                      |          |
| N(5')-C(15')-N(4')   | 122.8(3) |                      |          |
| O(2')-C(16')-H(16C)  | 111.0    |                      |          |
| O(2')-C(16')-H(16D)  | 111.0    |                      |          |
| O(2')-C(16')-C(17')  | 104.0(2) |                      |          |
| H(16C)-C(16')-H(16D) | 109.0    |                      |          |
| C(17')-C(16')-H(16C) | 111.0    |                      |          |
| C(17')-C(16')-H(16D) | 111.0    |                      |          |
| N(5')-C(17')-C(16')  | 103.4(2) |                      |          |
| N(5')-C(17')-H(17')  | 108.7    |                      |          |
| N(5')-C(17')-C(18')  | 113.2(2) |                      |          |
| C(16')-C(17')-H(17') | 108.7    |                      |          |
| C(18')-C(17')-C(16') | 114.0(2) |                      |          |
| C(18')-C(17')-H(17') | 108.7    |                      |          |
| C(17')-C(18')-H(18') | 108.4    |                      |          |
| C(17')-C(18')-C(19') | 111.0(2) |                      |          |
| C(17')-C(18')-C(20') | 109.9(2) |                      |          |
| C(19')-C(18')-H(18') | 108.4    |                      |          |

Table 4. Anisotropic displacement parameters ( $\text{\AA}^2 \times 10^3$ ) for (S,S)-6H. The anisotropic displacement factor exponent takes the form:  $-2\pi^2 [ h^2 a^{*2} U^{11} + \dots + 2 h k a^* b^* U^{12} ]$

|       | U <sup>11</sup> | U <sup>22</sup> | U <sup>33</sup> | U <sup>23</sup> | U <sup>13</sup> | U <sup>12</sup> |
|-------|-----------------|-----------------|-----------------|-----------------|-----------------|-----------------|
| O(1)  | 42(1)           | 23(1)           | 28(1)           | 8(1)            | 20(1)           | 17(1)           |
| O(2)  | 36(1)           | 21(1)           | 26(1)           | 7(1)            | 19(1)           | 12(1)           |
| N(1)  | 28(1)           | 20(1)           | 26(1)           | 8(1)            | 14(1)           | 14(1)           |
| N(2)  | 28(1)           | 26(1)           | 23(1)           | 9(1)            | 13(1)           | 15(1)           |
| N(3)  | 26(1)           | 20(1)           | 23(1)           | 8(1)            | 13(1)           | 11(1)           |
| N(4)  | 26(1)           | 23(1)           | 21(1)           | 7(1)            | 11(1)           | 12(1)           |
| N(5)  | 32(1)           | 26(1)           | 26(1)           | 10(1)           | 16(1)           | 17(1)           |
| C(1)  | 41(2)           | 30(2)           | 34(2)           | 15(1)           | 22(1)           | 19(1)           |
| C(2)  | 34(2)           | 24(2)           | 39(2)           | 14(1)           | 17(1)           | 14(1)           |
| C(3)  | 26(1)           | 23(1)           | 29(1)           | 10(1)           | 13(1)           | 12(1)           |
| C(4)  | 26(1)           | 19(1)           | 27(2)           | 6(1)            | 10(1)           | 10(1)           |
| C(5)  | 37(2)           | 22(2)           | 29(2)           | 8(1)            | 17(1)           | 15(1)           |
| C(6)  | 24(1)           | 22(2)           | 21(1)           | 6(1)            | 8(1)            | 12(1)           |
| C(7)  | 20(1)           | 24(2)           | 23(1)           | 9(1)            | 8(1)            | 11(1)           |
| C(8)  | 22(1)           | 26(2)           | 23(2)           | 9(1)            | 8(1)            | 14(1)           |
| C(9)  | 27(2)           | 29(2)           | 23(1)           | 8(1)            | 12(1)           | 16(1)           |
| C(10) | 30(2)           | 30(2)           | 29(2)           | 13(1)           | 16(1)           | 14(1)           |
| C(11) | 33(2)           | 24(2)           | 26(2)           | 11(1)           | 13(1)           | 14(1)           |
| C(12) | 29(2)           | 25(2)           | 25(1)           | 7(1)            | 12(1)           | 14(1)           |
| C(13) | 21(1)           | 26(2)           | 22(1)           | 9(1)            | 9(1)            | 12(1)           |
| C(14) | 21(1)           | 24(2)           | 21(1)           | 7(1)            | 8(1)            | 12(1)           |
| C(15) | 23(1)           | 21(2)           | 21(1)           | 6(1)            | 9(1)            | 11(1)           |
| C(16) | 32(2)           | 26(2)           | 24(1)           | 10(1)           | 16(1)           | 14(1)           |
| C(17) | 25(1)           | 23(1)           | 28(1)           | 9(1)            | 14(1)           | 12(1)           |
| C(18) | 28(2)           | 27(1)           | 25(1)           | 8(1)            | 13(1)           | 14(1)           |
| C(19) | 52(2)           | 35(2)           | 32(2)           | 12(1)           | 23(2)           | 25(2)           |
| C(20) | 40(2)           | 34(2)           | 28(2)           | 12(1)           | 18(1)           | 16(1)           |
| O(1') | 49(1)           | 25(1)           | 31(1)           | 7(1)            | 24(1)           | 17(1)           |
| O(2') | 32(1)           | 21(1)           | 26(1)           | 7(1)            | 16(1)           | 13(1)           |
| N(1') | 28(1)           | 22(1)           | 27(1)           | 7(1)            | 13(1)           | 11(1)           |
| N(2') | 30(1)           | 23(1)           | 27(1)           | 8(1)            | 15(1)           | 12(1)           |
| N(3') | 27(1)           | 22(1)           | 24(1)           | 9(1)            | 14(1)           | 12(1)           |
| N(4') | 27(1)           | 22(1)           | 25(1)           | 8(1)            | 12(1)           | 12(1)           |
| N(5') | 29(1)           | 22(1)           | 26(1)           | 8(1)            | 15(1)           | 11(1)           |
| C(1') | 38(2)           | 29(2)           | 35(2)           | 11(1)           | 21(1)           | 15(1)           |
| C(2') | 37(2)           | 24(2)           | 46(2)           | 12(1)           | 20(2)           | 14(1)           |

|        |       |       |       |       |       |       |
|--------|-------|-------|-------|-------|-------|-------|
| C(3')  | 29(2) | 23(1) | 28(1) | 8(1)  | 10(1) | 12(1) |
| C(4')  | 26(1) | 20(1) | 24(1) | 5(1)  | 7(1)  | 11(1) |
| C(5')  | 34(2) | 21(2) | 32(2) | 7(1)  | 13(1) | 15(1) |
| C(6')  | 25(2) | 23(2) | 23(1) | 3(1)  | 9(1)  | 13(1) |
| C(7')  | 23(1) | 25(2) | 22(1) | 7(1)  | 10(1) | 13(1) |
| C(8')  | 20(1) | 24(2) | 20(1) | 5(1)  | 7(1)  | 10(1) |
| C(9')  | 25(2) | 28(2) | 25(2) | 8(1)  | 11(1) | 12(1) |
| C(10') | 27(2) | 31(2) | 26(1) | 12(1) | 15(1) | 13(1) |
| C(11') | 28(2) | 24(2) | 28(2) | 10(1) | 11(1) | 13(1) |
| C(12') | 28(2) | 24(2) | 23(1) | 7(1)  | 10(1) | 13(1) |
| C(13') | 22(1) | 26(2) | 22(1) | 7(1)  | 9(1)  | 12(1) |
| C(14') | 21(1) | 21(2) | 23(1) | 6(1)  | 9(1)  | 10(1) |
| C(15') | 20(1) | 21(2) | 26(1) | 8(1)  | 10(1) | 8(1)  |
| C(16') | 26(2) | 23(2) | 26(2) | 10(1) | 14(1) | 11(1) |
| C(17') | 24(1) | 21(1) | 24(1) | 9(1)  | 12(1) | 11(1) |
| C(18') | 24(1) | 28(1) | 22(1) | 7(1)  | 10(1) | 12(1) |
| C(19') | 34(2) | 30(2) | 29(2) | 5(1)  | 16(1) | 18(1) |
| C(20') | 36(2) | 31(2) | 31(2) | 10(1) | 20(1) | 12(1) |

---

Table 5. Hydrogen coordinates ( $\times 10^4$ ) and isotropic displacement parameters ( $\text{\AA}^2 \times 10^{-3}$ ) for (S,S)-6H.

|        | x         | y        | z        | U(eq) |
|--------|-----------|----------|----------|-------|
| H(3)   | 14190(40) | 190(30)  | 8340(30) | 30(9) |
| H(1A)  | 17041     | 3831     | 7925     | 47    |
| H(1B)  | 15523     | 3780     | 6688     | 47    |
| H(1C)  | 15225     | 2500     | 7253     | 47    |
| H(2A)  | 15712     | 6215     | 9447     | 47    |
| H(2B)  | 15832     | 6077     | 8045     | 47    |
| H(2C)  | 17349     | 6155     | 9303     | 47    |
| H(3A)  | 14003     | 3883     | 7989     | 30    |
| H(4)   | 16870     | 4123     | 10177    | 29    |
| H(5A)  | 15829     | 5132     | 11390    | 34    |
| H(5B)  | 13978     | 4490     | 10169    | 34    |
| H(9)   | 11555     | -1628    | 11115    | 29    |
| H(10)  | 10455     | -4027    | 10821    | 33    |
| H(11)  | 10656     | -5574    | 9214     | 32    |
| H(12)  | 11942     | -4761    | 7849     | 30    |
| H(16A) | 16627     | 1024     | 6301     | 31    |
| H(16B) | 14755     | 454      | 5129     | 31    |
| H(17)  | 16933     | -841     | 5459     | 29    |
| H(18)  | 13815     | -1623    | 3204     | 31    |
| H(19A) | 14770     | -2893    | 1973     | 55    |
| H(19B) | 14595     | -3483    | 3151     | 55    |
| H(19C) | 16429     | -2481    | 3294     | 55    |
| H(20A) | 17203     | 82       | 3604     | 50    |
| H(20B) | 15834     | 652      | 3629     | 50    |
| H(20C) | 15541     | -380     | 2269     | 50    |
| H(3')  | 10400(40) | -540(30) | 5690(30) | 36(9) |
| H(1'A) | 8690      | -3881    | 6811     | 49    |
| H(1'B) | 6722      | -4297    | 5995     | 49    |
| H(1'C) | 8144      | -2901    | 6036     | 49    |
| H(2'A) | 7492      | -6714    | 3906     | 53    |
| H(2'B) | 6395      | -6666    | 4740     | 53    |
| H(2'C) | 8387      | -6198    | 5501     | 53    |
| H(3'A) | 6960      | -4724    | 3969     | 32    |
| H(4')  | 10456     | -4082    | 5424     | 29    |
| H(5'A) | 10286     | -5118    | 3451     | 35    |
| H(5'B) | 8388      | -5295    | 2684     | 35    |

|        |       |       |       |    |
|--------|-------|-------|-------|----|
| H(9')  | 12590 | 1247  | 2694  | 31 |
| H(10') | 13570 | 3635  | 2939  | 32 |
| H(11') | 13352 | 5168  | 4528  | 32 |
| H(12') | 12103 | 4352  | 5917  | 30 |
| H(16C) | 9669  | -1035 | 8761  | 28 |
| H(16D) | 7928  | -1014 | 7863  | 28 |
| H(17') | 10674 | 1103  | 10200 | 27 |
| H(18') | 7226  | 712   | 9007  | 29 |
| H(19D) | 9748  | 2458  | 11646 | 45 |
| H(19E) | 7834  | 2267  | 11046 | 45 |
| H(19F) | 9118  | 3038  | 10460 | 45 |
| H(20D) | 8734  | -163  | 11150 | 47 |
| H(20E) | 7337  | -1195 | 9690  | 47 |
| H(20F) | 6839  | -307  | 10647 | 47 |

XRD data for Pd((S,S)-6)<sub>2</sub>

Table 1. Crystal data and structure refinement for Pd((S,S)-6)(OAc).

|                                   |                                                                  |                 |
|-----------------------------------|------------------------------------------------------------------|-----------------|
| Identification code               | test4_c                                                          |                 |
| Empirical formula                 | C <sub>22</sub> H <sub>27</sub> N <sub>5</sub> O <sub>4</sub> Pd |                 |
| Formula weight                    | 531.88                                                           |                 |
| Temperature                       | 100 K                                                            |                 |
| Wavelength                        | 0.71073 Å                                                        |                 |
| Crystal system                    | Monoclinic                                                       |                 |
| Space group                       | P 1 21 1                                                         |                 |
| Unit cell dimensions              | a = 6.6646(5) Å                                                  | α = 90°.        |
|                                   | b = 12.2835(10) Å                                                | β = 95.441(2)°. |
|                                   | c = 13.5762(10) Å                                                | γ = 90°.        |
| Volume                            | 1106.40(15) Å <sup>3</sup>                                       |                 |
| Z                                 | 2                                                                |                 |
| Density (calculated)              | 1.597 Mg/m <sup>3</sup>                                          |                 |
| Absorption coefficient            | 0.878 mm <sup>-1</sup>                                           |                 |
| F(000)                            | 544                                                              |                 |
| Crystal size                      | 0.156 x 0.105 x 0.085 mm <sup>3</sup>                            |                 |
| Theta range for data collection   | 1.507 to 27.574°.                                                |                 |
| Index ranges                      | -8 ≤ h ≤ 8, -15 ≤ k ≤ 15, -17 ≤ l ≤ 17                           |                 |
| Reflections collected             | 12875                                                            |                 |
| Independent reflections           | 5069 [R(int) = 0.0333]                                           |                 |
| Completeness to theta = 26.000°   | 100.0 %                                                          |                 |
| Absorption correction             | Semi-empirical from equivalents                                  |                 |
| Max. and min. transmission        | 0.0949 and 0.0690                                                |                 |
| Refinement method                 | Full-matrix least-squares on F <sup>2</sup>                      |                 |
| Data / restraints / parameters    | 5069 / 1 / 294                                                   |                 |
| Goodness-of-fit on F <sup>2</sup> | 1.018                                                            |                 |
| Final R indices [I > 2σ(I)]       | R1 = 0.0289, wR2 = 0.0584                                        |                 |
| R indices (all data)              | R1 = 0.0380, wR2 = 0.0608                                        |                 |
| Absolute structure parameter      | 0.020(16)                                                        |                 |
| Extinction coefficient            | n/a                                                              |                 |
| Largest diff. peak and hole       | 0.412 and -0.441 e.Å <sup>-3</sup>                               |                 |

Table 2. Atomic coordinates ( $\times 10^4$ ) and equivalent isotropic displacement parameters ( $\text{\AA}^2 \times 10^3$ ) for Pd((*S,S*-6)(OAc).  $U(\text{eq})$  is defined as one third of the trace of the orthogonalized  $U^{\text{ij}}$  tensor.

|       | x        | y       | z       | U(eq) |
|-------|----------|---------|---------|-------|
| Pd(1) | 4991(1)  | 5057(1) | 2682(1) | 18(1) |
| O(3)  | 7496(4)  | 5002(6) | 1953(2) | 23(1) |
| O(2)  | 6211(5)  | 7911(3) | 4268(2) | 25(1) |
| O(1)  | 1771(5)  | 2218(3) | 1949(2) | 24(1) |
| N(3)  | 2790(5)  | 5104(8) | 3565(2) | 20(1) |
| N(1)  | 3924(6)  | 3623(3) | 2163(3) | 18(1) |
| N(5)  | 5915(6)  | 6508(3) | 3220(3) | 20(1) |
| O(4)  | 5985(5)  | 5201(4) | 423(2)  | 33(1) |
| N(2)  | 1079(6)  | 3410(3) | 3136(3) | 21(1) |
| C(15) | 6678(11) | 2369(5) | 1715(5) | 25(2) |
| N(4)  | 3646(6)  | 6748(3) | 4485(3) | 22(1) |
| C(12) | 5251(7)  | 6991(4) | 3961(3) | 21(1) |
| C(5)  | -33(8)   | 4655(4) | 4354(4) | 20(1) |
| C(13) | 7890(8)  | 8018(4) | 3671(4) | 25(1) |
| C(1)  | 4717(8)  | 2944(4) | 1368(3) | 22(1) |
| C(10) | 726(8)   | 5622(4) | 4761(4) | 20(1) |
| C(21) | 7476(6)  | 5081(9) | 1015(3) | 24(1) |
| C(14) | 7429(8)  | 7227(4) | 2810(4) | 24(1) |
| C(6)  | -1773(7) | 4192(4) | 4650(3) | 22(1) |
| C(2)  | 2941(7)  | 2183(4) | 1099(4) | 24(1) |
| C(4)  | 1325(7)  | 4323(4) | 3617(3) | 19(1) |
| C(22) | 9570(8)  | 5012(9) | 657(4)  | 42(1) |
| C(3)  | 2351(7)  | 3143(4) | 2430(3) | 21(1) |
| C(9)  | -188(8)  | 6164(4) | 5486(3) | 26(1) |
| C(7)  | -2690(8) | 4738(4) | 5391(4) | 24(1) |
| C(18) | 6556(12) | 7765(6) | 1849(5) | 29(2) |
| C(11) | 2541(8)  | 5893(4) | 4258(3) | 21(1) |
| C(8)  | -1909(9) | 5692(4) | 5795(4) | 28(1) |
| C(19) | 4657(9)  | 8413(4) | 1947(4) | 34(1) |
| C(17) | 7488(9)  | 1818(5) | 817(5)  | 44(2) |
| C(20) | 8172(10) | 8468(5) | 1423(4) | 38(2) |
| C(16) | 6435(9)  | 1555(4) | 2534(4) | 39(1) |



Table 3. Bond lengths [Å] and angles [°] for Pd((*S,S*-6)(OAc).

|              |          |                 |            |
|--------------|----------|-----------------|------------|
| Pd(1)-O(3)   | 2.021(3) | C(21)-C(22)     | 1.523(6)   |
| Pd(1)-N(3)   | 1.981(3) | C(14)-H(14)     | 1.0000     |
| Pd(1)-N(1)   | 2.002(4) | C(14)-C(18)     | 1.528(9)   |
| Pd(1)-N(5)   | 2.002(4) | C(6)-H(6)       | 0.9500     |
| O(3)-C(21)   | 1.277(5) | C(6)-C(7)       | 1.397(6)   |
| O(2)-C(12)   | 1.345(6) | C(2)-H(2A)      | 0.9900     |
| O(2)-C(13)   | 1.449(6) | C(2)-H(2B)      | 0.9900     |
| O(1)-C(2)    | 1.454(5) | C(22)-H(22A)    | 0.9800     |
| O(1)-C(3)    | 1.348(6) | C(22)-H(22B)    | 0.9800     |
| N(3)-C(4)    | 1.375(8) | C(22)-H(22C)    | 0.9800     |
| N(3)-C(11)   | 1.372(9) | C(9)-H(9)       | 0.9500     |
| N(1)-C(1)    | 1.499(6) | C(9)-C(8)       | 1.386(7)   |
| N(1)-C(3)    | 1.285(6) | C(7)-H(7)       | 0.9500     |
| N(5)-C(12)   | 1.281(6) | C(7)-C(8)       | 1.375(7)   |
| N(5)-C(14)   | 1.488(6) | C(18)-H(18)     | 1.0000     |
| O(4)-C(21)   | 1.226(5) | C(18)-C(19)     | 1.512(9)   |
| N(2)-C(4)    | 1.300(6) | C(18)-C(20)     | 1.535(9)   |
| N(2)-C(3)    | 1.377(6) | C(8)-H(8)       | 0.9500     |
| C(15)-H(15)  | 1.0000   | C(19)-H(19A)    | 0.9800     |
| C(15)-C(1)   | 1.521(9) | C(19)-H(19B)    | 0.9800     |
| C(15)-C(17)  | 1.537(9) | C(19)-H(19C)    | 0.9800     |
| C(15)-C(16)  | 1.515(9) | C(17)-H(17A)    | 0.9800     |
| N(4)-C(12)   | 1.373(6) | C(17)-H(17B)    | 0.9800     |
| N(4)-C(11)   | 1.303(6) | C(17)-H(17C)    | 0.9800     |
| C(5)-C(10)   | 1.385(6) | C(20)-H(20A)    | 0.9800     |
| C(5)-C(6)    | 1.385(7) | C(20)-H(20B)    | 0.9800     |
| C(5)-C(4)    | 1.470(7) | C(20)-H(20C)    | 0.9800     |
| C(13)-H(13A) | 0.9900   | C(16)-H(16A)    | 0.9800     |
| C(13)-H(13B) | 0.9900   | C(16)-H(16B)    | 0.9800     |
| C(13)-C(14)  | 1.529(7) | C(16)-H(16C)    | 0.9800     |
| C(1)-H(1)    | 1.0000   |                 |            |
| C(1)-C(2)    | 1.525(7) | N(3)-Pd(1)-O(3) | 172.15(13) |
| C(10)-C(9)   | 1.378(7) | N(3)-Pd(1)-N(1) | 88.9(3)    |
| C(10)-C(11)  | 1.482(7) | N(3)-Pd(1)-N(5) | 88.4(3)    |

|                     |            |                     |          |
|---------------------|------------|---------------------|----------|
| N(1)-Pd(1)-O(3)     | 94.6(2)    | N(1)-C(1)-H(1)      | 109.4    |
| N(5)-Pd(1)-O(3)     | 88.2(2)    | N(1)-C(1)-C(2)      | 101.2(4) |
| N(5)-Pd(1)-N(1)     | 177.02(16) | C(15)-C(1)-H(1)     | 109.4    |
| C(21)-O(3)-Pd(1)    | 123.7(3)   | C(15)-C(1)-C(2)     | 114.5(4) |
| C(12)-O(2)-C(13)    | 105.9(3)   | C(2)-C(1)-H(1)      | 109.4    |
| C(3)-O(1)-C(2)      | 105.0(3)   | C(5)-C(10)-C(11)    | 107.0(5) |
| C(4)-N(3)-Pd(1)     | 125.5(5)   | C(9)-C(10)-C(5)     | 122.0(5) |
| C(11)-N(3)-Pd(1)    | 125.5(5)   | C(9)-C(10)-C(11)    | 131.0(5) |
| C(11)-N(3)-C(4)     | 109.0(3)   | O(3)-C(21)-C(22)    | 113.0(4) |
| C(1)-N(1)-Pd(1)     | 127.2(3)   | O(4)-C(21)-O(3)     | 126.5(4) |
| C(3)-N(1)-Pd(1)     | 125.2(3)   | O(4)-C(21)-C(22)    | 120.5(4) |
| C(3)-N(1)-C(1)      | 107.5(4)   | N(5)-C(14)-C(13)    | 100.7(4) |
| C(12)-N(5)-Pd(1)    | 125.5(3)   | N(5)-C(14)-H(14)    | 110.2    |
| C(12)-N(5)-C(14)    | 108.4(4)   | N(5)-C(14)-C(18)    | 111.0(5) |
| C(14)-N(5)-Pd(1)    | 126.0(3)   | C(13)-C(14)-H(14)   | 110.2    |
| C(4)-N(2)-C(3)      | 119.9(4)   | C(18)-C(14)-C(13)   | 114.2(5) |
| C(1)-C(15)-H(15)    | 108.2      | C(18)-C(14)-H(14)   | 110.2    |
| C(1)-C(15)-C(17)    | 108.3(6)   | C(5)-C(6)-H(6)      | 121.7    |
| C(17)-C(15)-H(15)   | 108.2      | C(5)-C(6)-C(7)      | 116.6(4) |
| C(16)-C(15)-H(15)   | 108.2      | C(7)-C(6)-H(6)      | 121.7    |
| C(16)-C(15)-C(1)    | 112.7(5)   | O(1)-C(2)-C(1)      | 104.7(4) |
| C(16)-C(15)-C(17)   | 111.2(6)   | O(1)-C(2)-H(2A)     | 110.8    |
| C(11)-N(4)-C(12)    | 120.3(4)   | O(1)-C(2)-H(2B)     | 110.8    |
| O(2)-C(12)-N(4)     | 113.2(4)   | C(1)-C(2)-H(2A)     | 110.8    |
| N(5)-C(12)-O(2)     | 116.2(4)   | C(1)-C(2)-H(2B)     | 110.8    |
| N(5)-C(12)-N(4)     | 130.5(4)   | H(2A)-C(2)-H(2B)    | 108.9    |
| C(10)-C(5)-C(4)     | 106.5(5)   | N(3)-C(4)-C(5)      | 109.1(4) |
| C(6)-C(5)-C(10)     | 121.4(5)   | N(2)-C(4)-N(3)      | 129.2(5) |
| C(6)-C(5)-C(4)      | 132.1(5)   | N(2)-C(4)-C(5)      | 121.7(4) |
| O(2)-C(13)-H(13A)   | 110.7      | C(21)-C(22)-H(22A)  | 109.5    |
| O(2)-C(13)-H(13B)   | 110.7      | C(21)-C(22)-H(22B)  | 109.5    |
| O(2)-C(13)-C(14)    | 105.1(4)   | C(21)-C(22)-H(22C)  | 109.5    |
| H(13A)-C(13)-H(13B) | 108.8      | H(22A)-C(22)-H(22B) | 109.5    |
| C(14)-C(13)-H(13A)  | 110.7      | H(22A)-C(22)-H(22C) | 109.5    |
| C(14)-C(13)-H(13B)  | 110.7      | H(22B)-C(22)-H(22C) | 109.5    |
| N(1)-C(1)-C(15)     | 112.7(4)   | O(1)-C(3)-N(2)      | 111.7(4) |

|                     |          |                     |       |
|---------------------|----------|---------------------|-------|
| N(1)-C(3)-O(1)      | 117.0(4) | H(20A)-C(20)-H(20C) | 109.5 |
| N(1)-C(3)-N(2)      | 131.3(4) | H(20B)-C(20)-H(20C) | 109.5 |
| C(10)-C(9)-H(9)     | 121.7    | C(15)-C(16)-H(16A)  | 109.5 |
| C(10)-C(9)-C(8)     | 116.7(5) | C(15)-C(16)-H(16B)  | 109.5 |
| C(8)-C(9)-H(9)      | 121.7    | C(15)-C(16)-H(16C)  | 109.5 |
| C(6)-C(7)-H(7)      | 119.3    | H(16A)-C(16)-H(16B) | 109.5 |
| C(8)-C(7)-C(6)      | 121.5(5) | H(16A)-C(16)-H(16C) | 109.5 |
| C(8)-C(7)-H(7)      | 119.3    | H(16B)-C(16)-H(16C) | 109.5 |
| C(14)-C(18)-H(18)   | 107.2    |                     |       |
| C(14)-C(18)-C(20)   | 109.9(6) |                     |       |
| C(19)-C(18)-C(14)   | 114.0(5) |                     |       |
| C(19)-C(18)-H(18)   | 107.2    |                     |       |
| C(19)-C(18)-C(20)   | 111.1(6) |                     |       |
| C(20)-C(18)-H(18)   | 107.2    |                     |       |
| N(3)-C(11)-C(10)    | 108.3(4) |                     |       |
| N(4)-C(11)-N(3)     | 129.0(5) |                     |       |
| N(4)-C(11)-C(10)    | 122.7(4) |                     |       |
| C(9)-C(8)-H(8)      | 119.1    |                     |       |
| C(7)-C(8)-C(9)      | 121.9(5) |                     |       |
| C(7)-C(8)-H(8)      | 119.1    |                     |       |
| C(18)-C(19)-H(19A)  | 109.5    |                     |       |
| C(18)-C(19)-H(19B)  | 109.5    |                     |       |
| C(18)-C(19)-H(19C)  | 109.5    |                     |       |
| H(19A)-C(19)-H(19B) | 109.5    |                     |       |
| H(19A)-C(19)-H(19C) | 109.5    |                     |       |
| H(19B)-C(19)-H(19C) | 109.5    |                     |       |
| C(15)-C(17)-H(17A)  | 109.5    |                     |       |
| C(15)-C(17)-H(17B)  | 109.5    |                     |       |
| C(15)-C(17)-H(17C)  | 109.5    |                     |       |
| H(17A)-C(17)-H(17B) | 109.5    |                     |       |
| H(17A)-C(17)-H(17C) | 109.5    |                     |       |
| H(17B)-C(17)-H(17C) | 109.5    |                     |       |
| C(18)-C(20)-H(20A)  | 109.5    |                     |       |
| C(18)-C(20)-H(20B)  | 109.5    |                     |       |
| C(18)-C(20)-H(20C)  | 109.5    |                     |       |
| H(20A)-C(20)-H(20B) | 109.5    |                     |       |

Table 4. Anisotropic displacement parameters ( $\text{\AA}^2 \times 10^3$ ) for Pd((S,S-6)(OAc). The anisotropic displacement factor exponent takes the form:  $-2\pi^2 [ h^2 a^{*2}U^{11} + \dots + 2 h k a^* b^* U^{12} ]$

|       | U <sup>11</sup> | U <sup>22</sup> | U <sup>33</sup> | U <sup>23</sup> | U <sup>13</sup> | U <sup>12</sup> |
|-------|-----------------|-----------------|-----------------|-----------------|-----------------|-----------------|
| Pd(1) | 20(1)           | 15(1)           | 20(1)           | -1(1)           | 6(1)            | 0(1)            |
| O(3)  | 25(2)           | 21(2)           | 26(1)           | 1(3)            | 9(1)            | 1(3)            |
| O(2)  | 26(2)           | 22(2)           | 27(2)           | -4(1)           | 8(1)            | -5(1)           |
| O(1)  | 28(2)           | 21(2)           | 26(2)           | -7(1)           | 11(2)           | -6(2)           |
| N(3)  | 22(2)           | 18(2)           | 20(2)           | 5(3)            | 4(1)            | -6(3)           |
| N(1)  | 21(2)           | 17(2)           | 18(2)           | -3(2)           | 5(2)            | 1(2)            |
| N(5)  | 18(2)           | 16(2)           | 27(2)           | -2(2)           | 6(2)            | -4(2)           |
| O(4)  | 39(2)           | 29(3)           | 32(2)           | 7(2)            | 5(1)            | 1(2)            |
| N(2)  | 23(2)           | 19(2)           | 21(2)           | -1(2)           | 6(2)            | 1(2)            |
| C(15) | 22(4)           | 25(4)           | 30(4)           | -10(3)          | 3(3)            | -6(3)           |
| N(4)  | 25(2)           | 18(2)           | 23(2)           | -3(2)           | 8(2)            | -1(2)           |
| C(12) | 23(3)           | 14(2)           | 25(3)           | -1(2)           | 1(2)            | 1(2)            |
| C(5)  | 26(3)           | 21(2)           | 13(2)           | 5(2)            | 5(2)            | 6(2)            |
| C(13) | 28(3)           | 23(2)           | 26(3)           | -5(2)           | 8(2)            | -5(2)           |
| C(1)  | 27(3)           | 23(2)           | 19(3)           | -4(2)           | 8(2)            | -1(2)           |
| C(10) | 22(3)           | 20(3)           | 20(3)           | 8(2)            | 6(2)            | 3(2)            |
| C(21) | 31(2)           | 15(2)           | 27(2)           | 1(5)            | 6(2)            | 4(4)            |
| C(14) | 24(3)           | 19(2)           | 30(3)           | -2(2)           | 7(2)            | -5(2)           |
| C(6)  | 21(3)           | 21(2)           | 24(3)           | 2(2)            | 2(2)            | -1(2)           |
| C(2)  | 23(3)           | 24(3)           | 27(3)           | -5(2)           | 9(2)            | -2(2)           |
| C(4)  | 20(3)           | 18(2)           | 20(2)           | 6(2)            | 2(2)            | 2(2)            |
| C(22) | 42(3)           | 49(3)           | 39(3)           | 17(5)           | 22(2)           | 16(5)           |
| C(3)  | 26(3)           | 18(2)           | 19(2)           | -2(2)           | 3(2)            | 1(2)            |
| C(9)  | 32(3)           | 23(2)           | 24(3)           | -3(2)           | 7(2)            | 0(2)            |
| C(7)  | 26(3)           | 22(3)           | 26(3)           | 6(2)            | 10(2)           | 3(2)            |
| C(18) | 36(4)           | 26(4)           | 27(4)           | -2(3)           | 11(3)           | -11(3)          |
| C(11) | 25(3)           | 20(2)           | 19(2)           | 3(2)            | 4(2)            | 5(2)            |
| C(8)  | 34(3)           | 27(3)           | 24(3)           | -2(2)           | 13(2)           | 4(2)            |
| C(19) | 43(4)           | 26(3)           | 34(3)           | 4(2)            | 4(2)            | 3(2)            |
| C(17) | 28(3)           | 48(4)           | 56(4)           | -29(3)          | 10(3)           | -3(3)           |
| C(20) | 55(4)           | 33(3)           | 30(3)           | 1(3)            | 15(3)           | -13(3)          |
| C(16) | 38(4)           | 23(3)           | 55(4)           | -3(3)           | -2(3)           | 5(2)            |

Table 5. Hydrogen coordinates ( $\times 10^4$ ) and isotropic displacement parameters ( $\text{\AA}^2 \times 10^{-3}$ ) for Pd((*S,S*-**6**)(OAc).

|        | x     | y    | z    | U(eq) |
|--------|-------|------|------|-------|
| H(15)  | 7676  | 2932 | 1975 | 30    |
| H(13A) | 9173  | 7824 | 4059 | 30    |
| H(13B) | 7990  | 8774 | 3425 | 30    |
| H(1)   | 4931  | 3416 | 787  | 27    |
| H(14)  | 8663  | 6800 | 2695 | 29    |
| H(6)   | -2315 | 3537 | 4364 | 26    |
| H(2A)  | 2128  | 2439 | 495  | 29    |
| H(2B)  | 3415  | 1434 | 984  | 29    |
| H(22A) | 10496 | 5484 | 1065 | 63    |
| H(22B) | 9509  | 5248 | -35  | 63    |
| H(22C) | 10052 | 4258 | 709  | 63    |
| H(9)   | 335   | 6829 | 5760 | 31    |
| H(7)   | -3878 | 4444 | 5621 | 29    |
| H(18)  | 6199  | 7168 | 1362 | 35    |
| H(8)   | -2569 | 6037 | 6301 | 34    |
| H(19A) | 3632  | 7939 | 2193 | 51    |
| H(19B) | 4153  | 8706 | 1299 | 51    |
| H(19C) | 4956  | 9014 | 2412 | 51    |
| H(17A) | 6485  | 1302 | 520  | 65    |
| H(17B) | 8739  | 1429 | 1030 | 65    |
| H(17C) | 7758  | 2373 | 327  | 65    |
| H(20A) | 8604  | 9044 | 1896 | 58    |
| H(20B) | 7612  | 8795 | 799  | 58    |
| H(20C) | 9332  | 8012 | 1304 | 58    |
| H(16A) | 6023  | 1937 | 3116 | 59    |
| H(16B) | 7720  | 1183 | 2709 | 59    |
| H(16C) | 5404  | 1019 | 2307 | 59    |
